# Supplementary material for: Reply to the ‘Comment on “Zemplén transesterification: a name reaction that has misled us for 90 years”’ by G. Poli, C. Pezzetta, I. Leito and S. Tshepelevitsh, Green Chemistry, 2018, 20, DOI: 10.1039/c7gc03795c
Source: Royal Society of Chemistry journal article supplement (doi:10.1039/c8gc00814k), 2018-01-01
Supplement: c8gc00814k1.pdf [file c8gc00814k1.pdf]

## Supporting Information

**Reply to the ‘Comment on “Zemplén transesterification: a name reaction that has misled us for 90 years”’ by G. Poli, C. Pezzetta, I. Leito and S. Tshepelevitsh, Green Chemistry, 2018, 20, DOI: 10.1039/c7gc03795c**

Bo Ren<sup>b</sup>, Jiantao Ge<sup>a</sup>, and Hai Dong<sup>a,\*</sup>

<sup>a</sup> School of Chemistry & Chemical Engineering, Huazhong University of Science & Technology, Luoyu Road 1037, 430074, Wuhan, P.R. China, [hdong@mail.hust.edu.cn](mailto:hdong@mail.hust.edu.cn)

<sup>b</sup> College of Chemistry and Chemical Engineering, Xinyang Normal University, Nanhu Road 237, Xinyang, Henan 464000, P. R. China.

**General Methods:** All commercially available starting materials and solvents were of reagent grade and used without further purification.  $^1\text{H}$  NMR spectra were recorded at 298K in  $\text{CD}_3\text{OD}$  by a 600 M NMR instrument (JNM-ECZ600R/S3) using the residual signals from  $\text{CD}_3\text{OD}$  ( $^1\text{H}$ :  $\delta = 3.31$  ppm) as internal standard.

**General Method for Measuring the Rate Constant (k):** As step b) in Figure S1 is the rate-determining step, the rate constants (k) can be measured using the following equation:  $\ln(B_0/B) = k \cdot A \cdot t$ , where A stands for the concentration of base catalysts, B stands for the concentration of esters, k stands for the rate constant, and t is the reaction time. The values of  $B_0/B$  can be measured over time using  $^1\text{H}$  NMR tests. In Figure S1, A stands for the concentration of the H-bonding complex and X stands for MeO or OH group. As methanol acts as solvent in the reaction, A equals to the concentration of hydroxyl anion or methoxyl anion and is a constant. Therefore, we can get the differential equation (1) which is related to the rate constant k and the concentration of the esters (B). To solve the differential equation (1) gets equation (2).  $B_0$  stands for the initial concentration of the esters in equation (2). Therefore, the value of k can be measured through recording the concentration of the esters (B) with time (t).

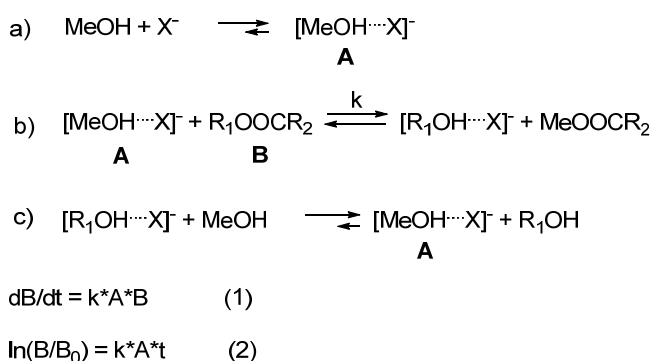

Figure S1. The value of k can be measured via recording the concentration of the esters (B) with time (t).

**Solution A:** NaOH (12 mg) was solved in *d*-methanol (1.2 mL).

**Solution B:** NaOH (20 mg) was solved in methanol (20 mL). The solution was kept at 70 °C for 2 h and then was evaporated to removing most of the methanol. The process was repeated for 3 times to obtain fresh MeONa. Then the concentrate (fresh MeONa) was solved in *d*-methanol (2.0 mL).

**Solution C:** NaOH (12 mg) was solved in  $\text{D}_2\text{O}$  (1.2 mL).

**Solution D:** NaOH (20 mg) was solved in methanol (20 mL). The solution was kept at 70 °C for 2 h and then was evaporated to removing most of the methanol. The process was repeated for 3 times to obtain fresh MeONa. Then the concentrate (fresh MeONa) was solved in  $\text{D}_2\text{O}$  (2.0 mL).

**The General NMR Experiments for Transesterification of Ethyl Benzoate in *d*-Methanol:** a) Ethyl benzoate (10  $\mu$ L) was solved in *d*-methanol (0.5 mL) and then was added **solution A** (28  $\mu$ L, 0.1 eq). The NMR spectrum was recorded with times. b) Ethyl benzoate (10  $\mu$ L) was solved in *d*-methanol (0.5 mL) and then was added **solution B** (28  $\mu$ L, 0.1 eq). The NMR spectrum was recorded with times.

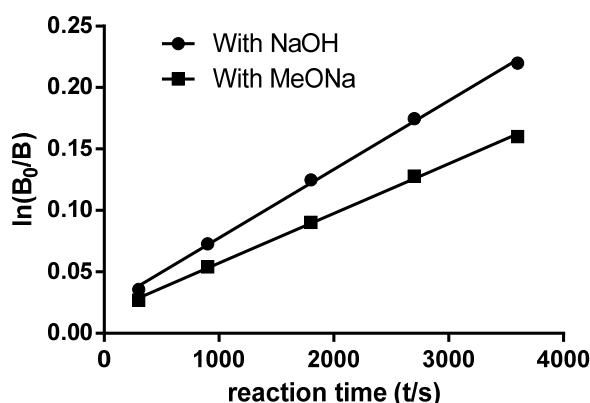

Figure S2. The values of  $k$  were measured for transesterification of ethyl benzoate in *d*-methanol. a) NaOH (0.1 eq) as catalyst,  $k_{OH}^*A = 5.584 \times 10^{-5} \pm 0.116/s$ ,  $R^2 = 0.9987$ ; b) NaOMe (0.1 eq) as catalyst,  $k_{MeO}^*A = 4.04 \times 10^{-5} \pm 0.083/s$ ,  $R^2 = 0.9987$ , therefore,  $k_{OH}/k_{MeO} = 1.38$ .

**The General NMR Experiments for Transesterification of n-Propyl Acetate in *d*-Methanol:** a) n-Propyl acetate (10  $\mu$ L) was solved in *d*-methanol (0.5 mL) and then was added **solution A** (7  $\mu$ L, 0.02 eq). The NMR spectrum was recorded with times. b) n-Propyl acetate (10  $\mu$ L) was solved in *d*-methanol (0.5 mL) and then was added **solution B** (7  $\mu$ L, 0.02 eq). The NMR spectrum was recorded with times.

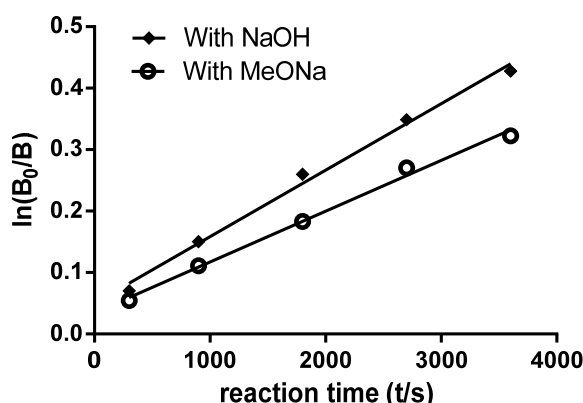

Figure S3. The values of  $k$  were measured for transesterification of n-Propyl acetate in *d*-methanol. a) NaOH (0.02 eq.) as catalyst,  $k_{OH}^*A = 10.83 \times 10^{-5} \pm 0.52/s$ ,  $R^2 = 0.9932$ ; b) NaOMe (0.02 eq) as catalyst,  $k_{MeO}^*A = 8.261 \times 10^{-5} \pm 0.36/s$ ,  $R^2 = 0.9944$ , therefore,  $k_{OH}/k_{MeO} = 1.31$ .

**The General NMR Experiments for Transesterification of Ethyl Benzoate in *d*-Methanol:D<sub>2</sub>O (9:1):** a) Ethyl benzoate (10  $\mu$ L) was solved in *d*-methanol:D<sub>2</sub>O (9:1) (0.5 mL) and then was added **solution A** (28  $\mu$ L, 0.1 eq). The NMR spectrum was recorded with times. b) Ethyl benzoate (10  $\mu$ L) was solved in *d*-methanol:D<sub>2</sub>O (9:1) (0.5 mL) and then was added **solution B** (28  $\mu$ L, 0.1 eq). The NMR spectrum was recorded with times.

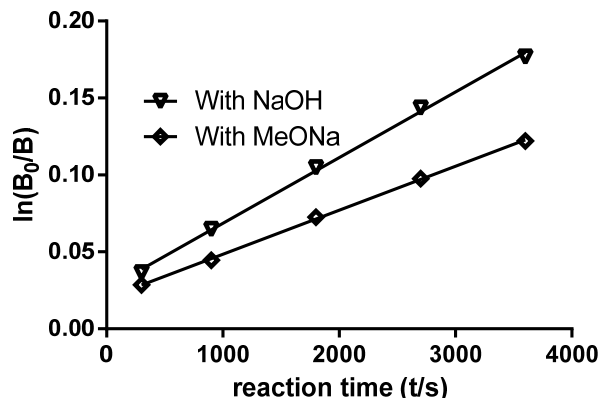

Figure S4. The values of  $k$  were measured for transesterification of ethyl benzoate in *d*-MeOD:D<sub>2</sub>O (9:1). a) NaOH (0.1 eq) as catalyst,  $k_{OH} \cdot A = 4.267 \times 10^{-5} \pm 0.103/s$ ,  $R^2 = 0.9982$ ; b) NaOMe (0.1 eq) as catalyst,  $k_{MeO} \cdot A = 2.855 \times 10^{-5} \pm 0.039/s$ ,  $R^2 = 0.9994$ , therefore,  $k_{OH}/k_{MeO} = 1.49$ .

**The General NMR Experiments for Transesterification of Ethyl Benzoate in *d*-Methanol:D<sub>2</sub>O:** a) Ethyl benzoate (10  $\mu$ L) was solved in *d*-methanol (0.5 mL) and then was added **solution C** (28  $\mu$ L, 0.1 eq). The NMR spectrum was recorded with times. b) Ethyl benzoate (10  $\mu$ L) was solved in *d*-methanol (0.5 mL) and then was added **solution D** (28  $\mu$ L, 0.1 eq). The NMR spectrum was recorded with times.

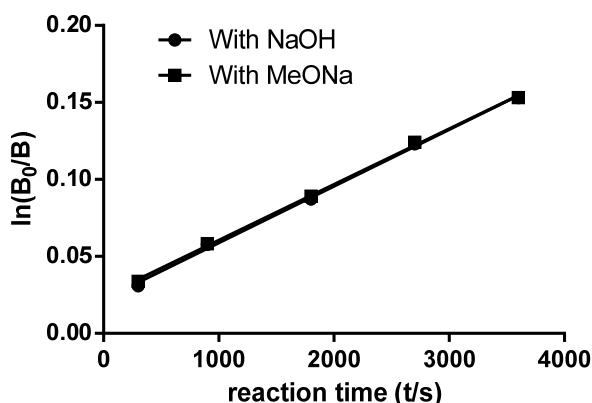

Figure S5. The values of  $k$  were measured for transesterification of ethyl benzoate in  $d$ -MeOD:D<sub>2</sub>O. a) NaOH (0.1 eq) as catalyst,  $k_{OH}^*A = 3.675 \times 10^{-5} \pm 0.091/s$ ,  $R^2 = 0.9982$ ; b) NaOMe (0.1 eq) as catalyst,  $k_{MeO}^*A = 3.617 \times 10^{-5} \pm 0.071/s$ ,  $R^2 = 0.9988$ , therefore,  $k_{OH}/k_{MeO} = 1$ .

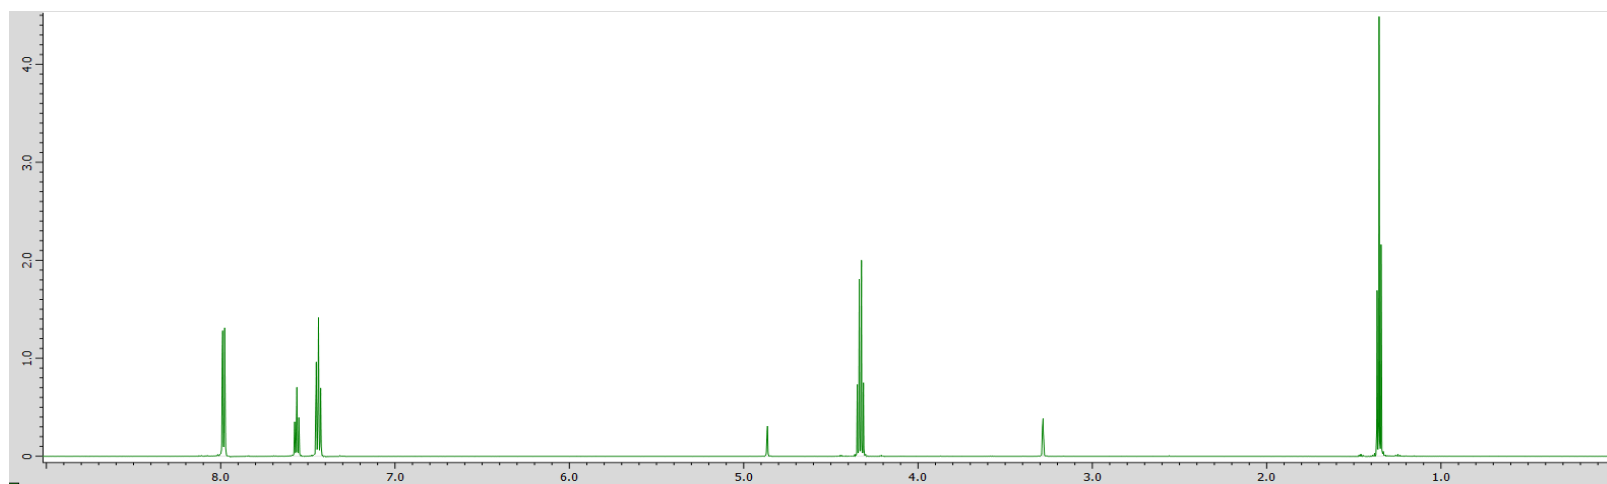

Figure S6. Recorded ethyl benzoate in  $d$ -methanol

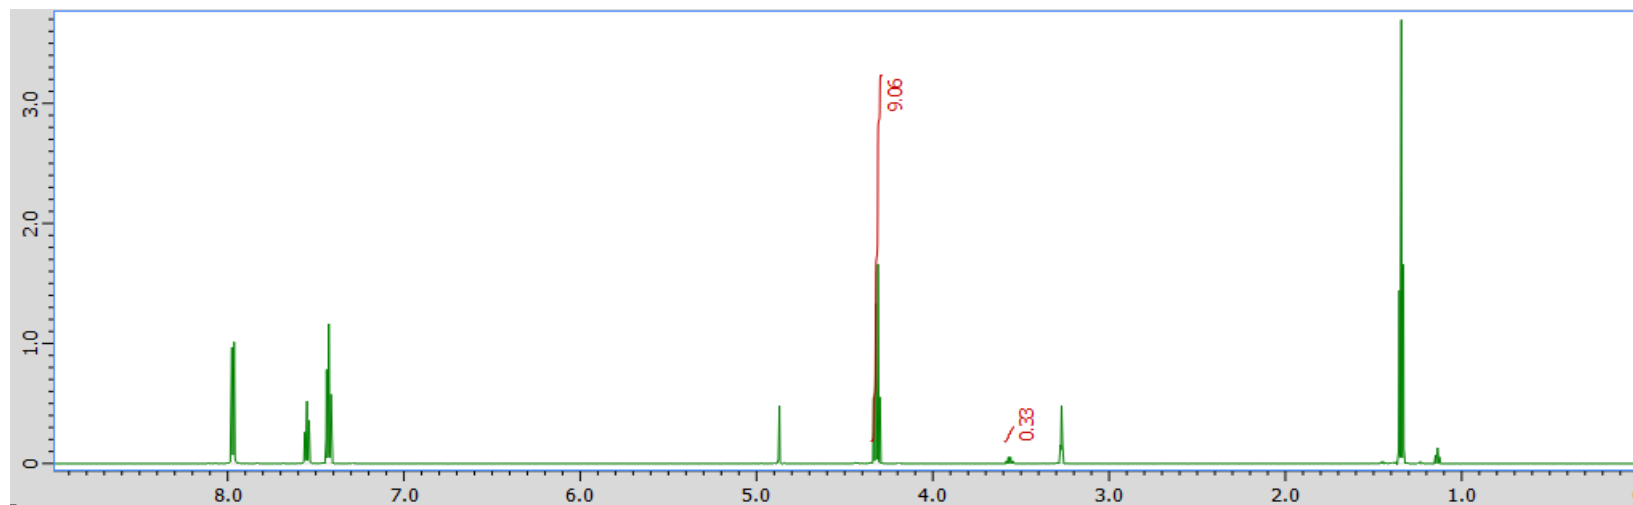

Figure S6a. Recorded transesterification of ethyl benzoate in  $d$ -methanol catalyzed by NaOH in 5 min.

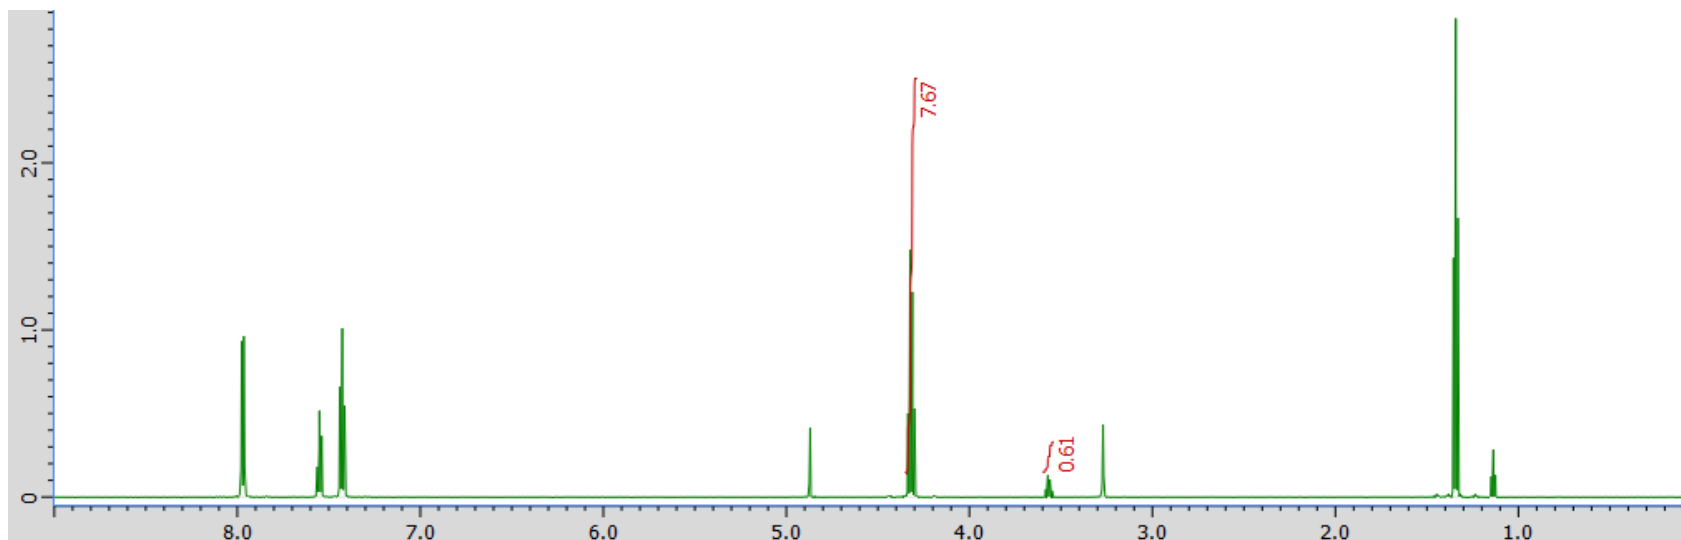

Figure S6b. Recorded transesterification of ethyl benzoate in *d*-methanol catalyzed by NaOH in 15 min.

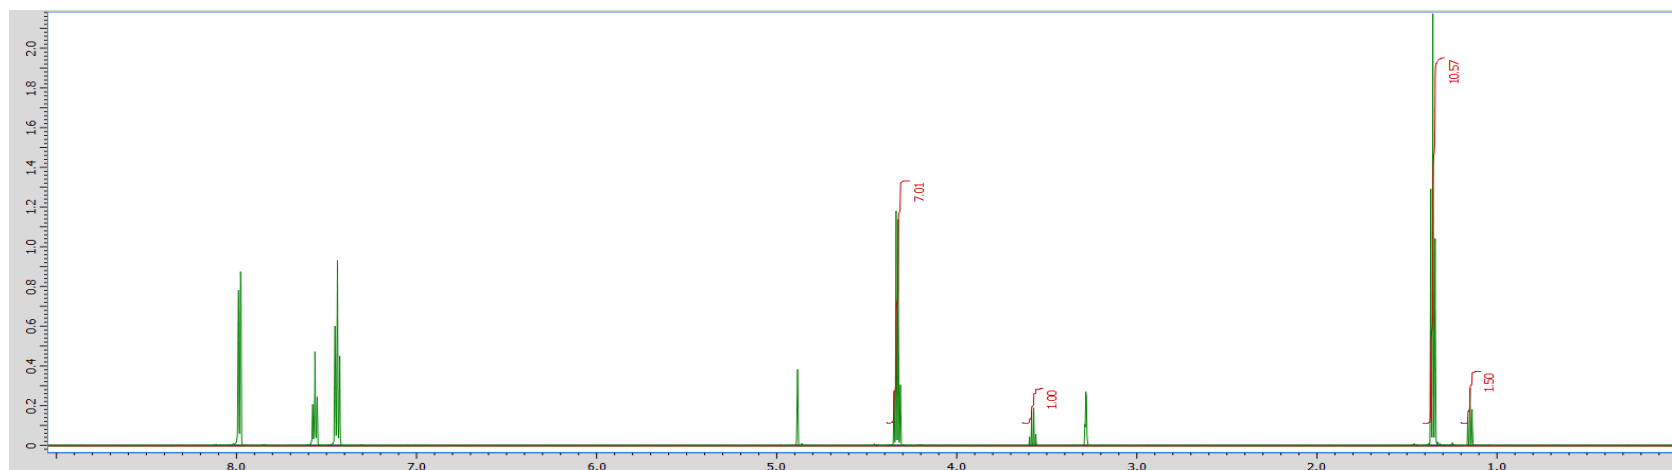

Figure S6c. Recorded transesterification of ethyl benzoate in *d*-methanol catalyzed by NaOH in 30 min.

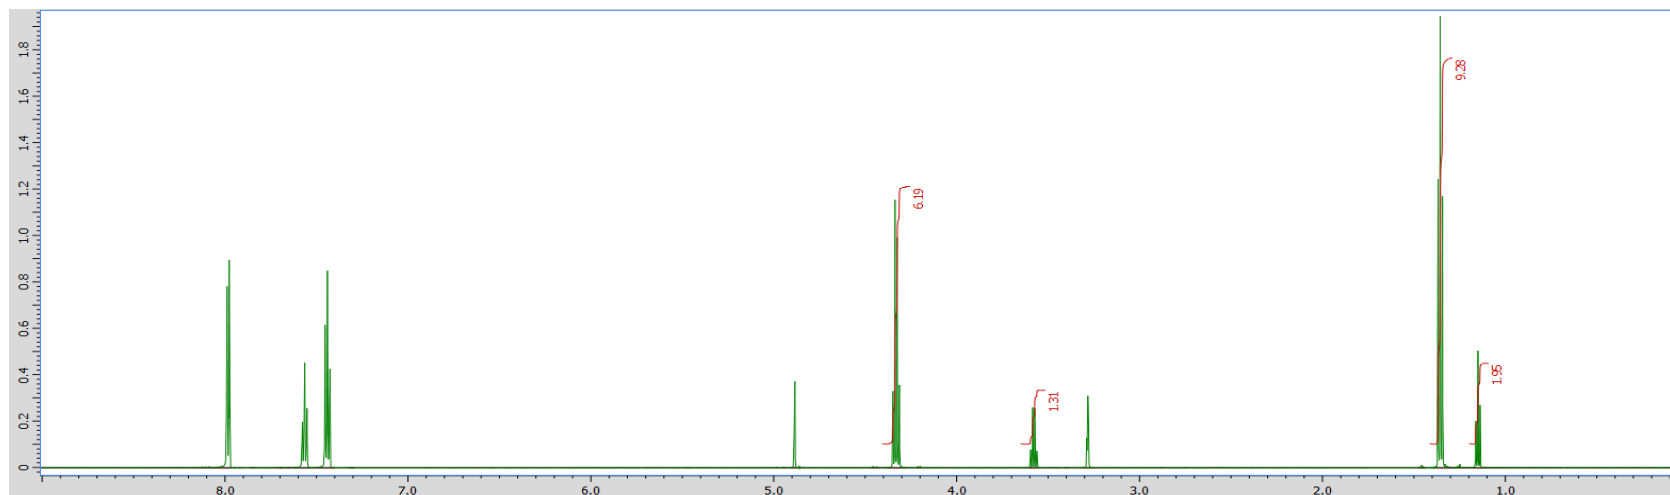

Figure S6d. Recorded transesterification of ethyl benzoate in *d*-methanol catalyzed by NaOH in 45 min.

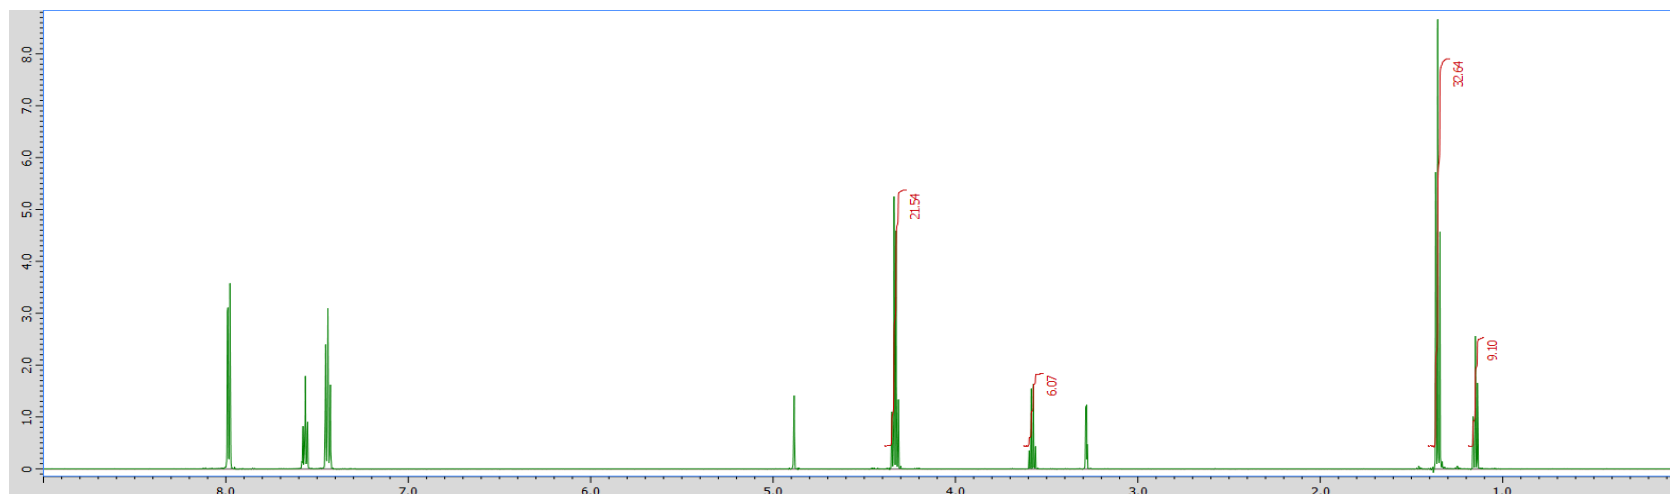

Figure S6e. Recorded transesterification of ethyl benzoate in *d*-methanol catalyzed by NaOH in 60 min.



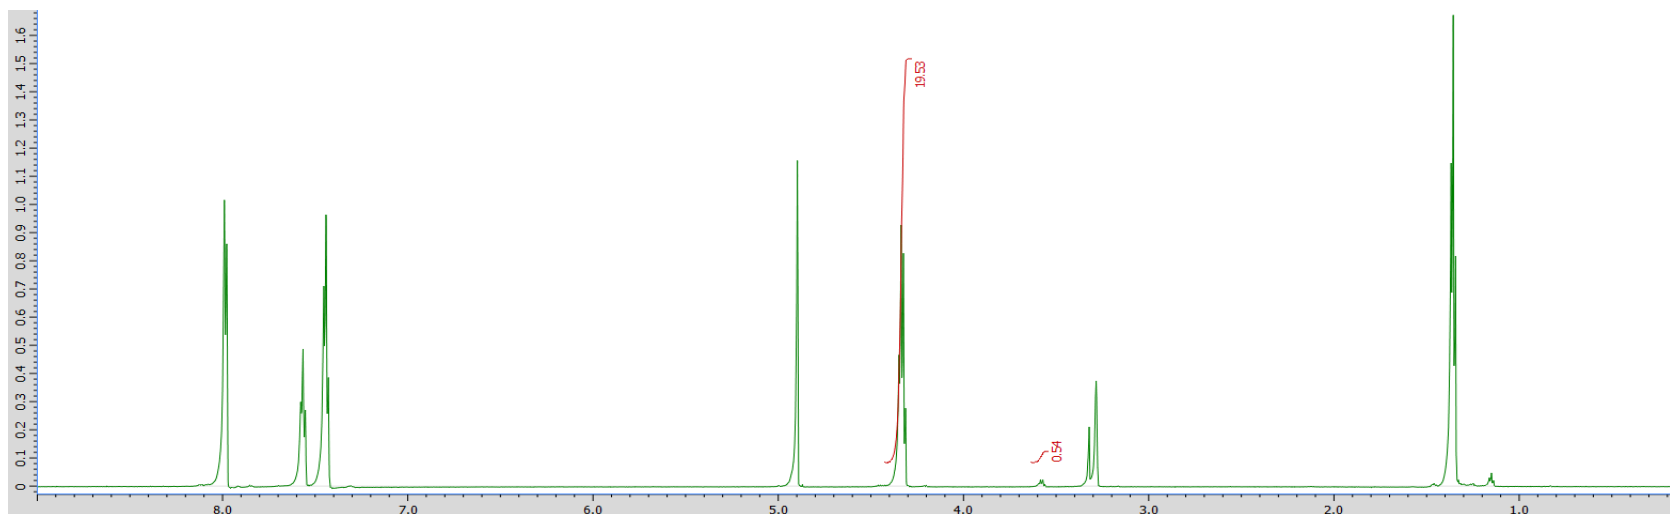

Figure S7a. Recorded transesterification of ethyl benzoate in *d*-methanol catalyzed by MeONa in 5 min.

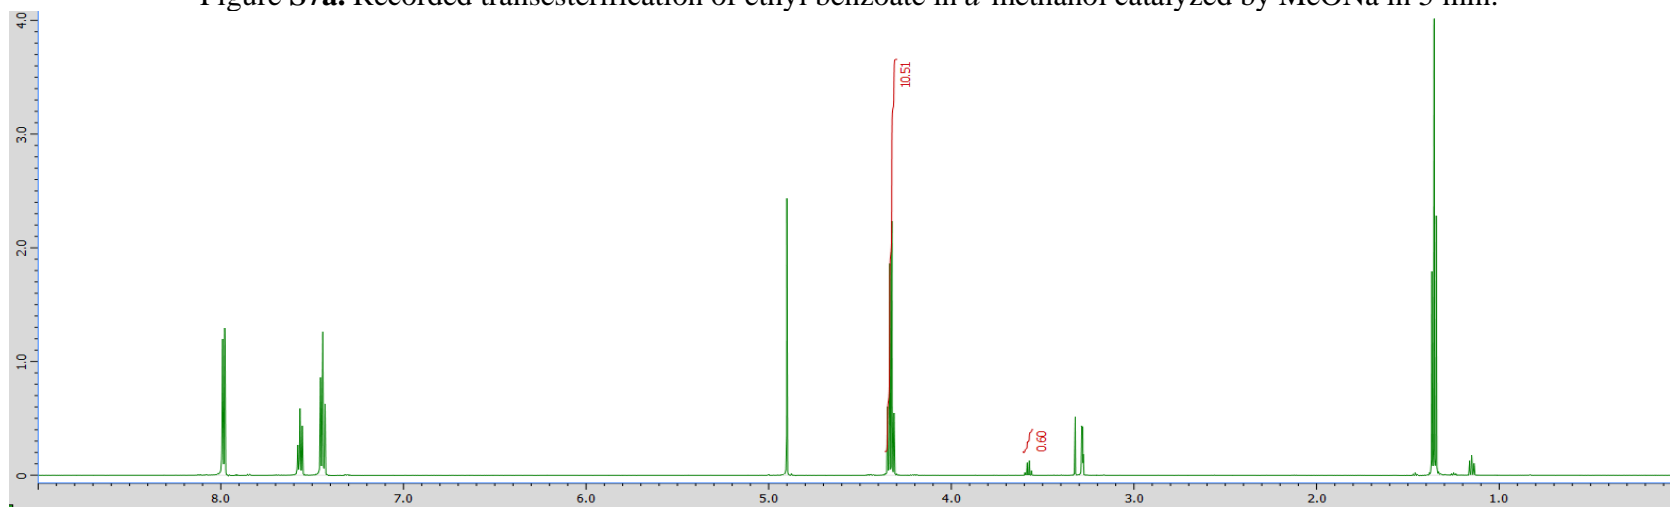

Figure S7b. Recorded transesterification of ethyl benzoate in *d*-methanol catalyzed by MeONa in 15 min.

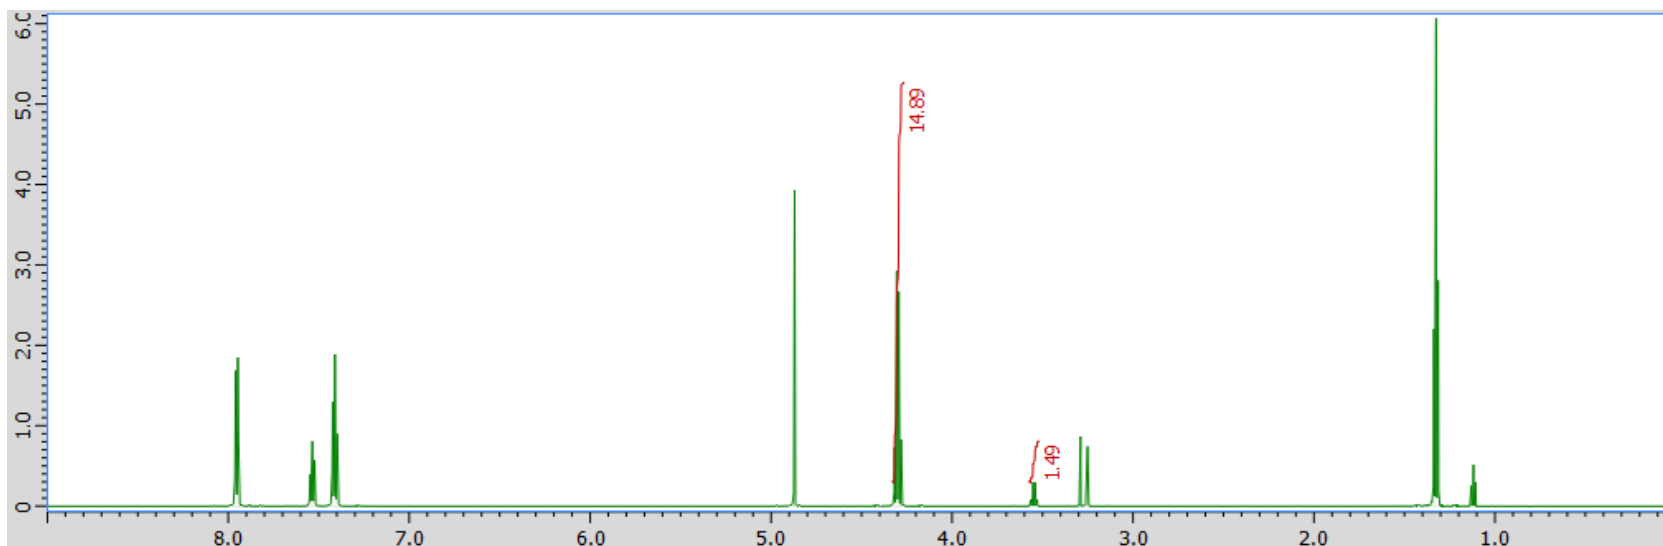

Figure S7c. Recorded transesterification of ethyl benzoate in *d*-methanol catalyzed by MeONa in 30 min.

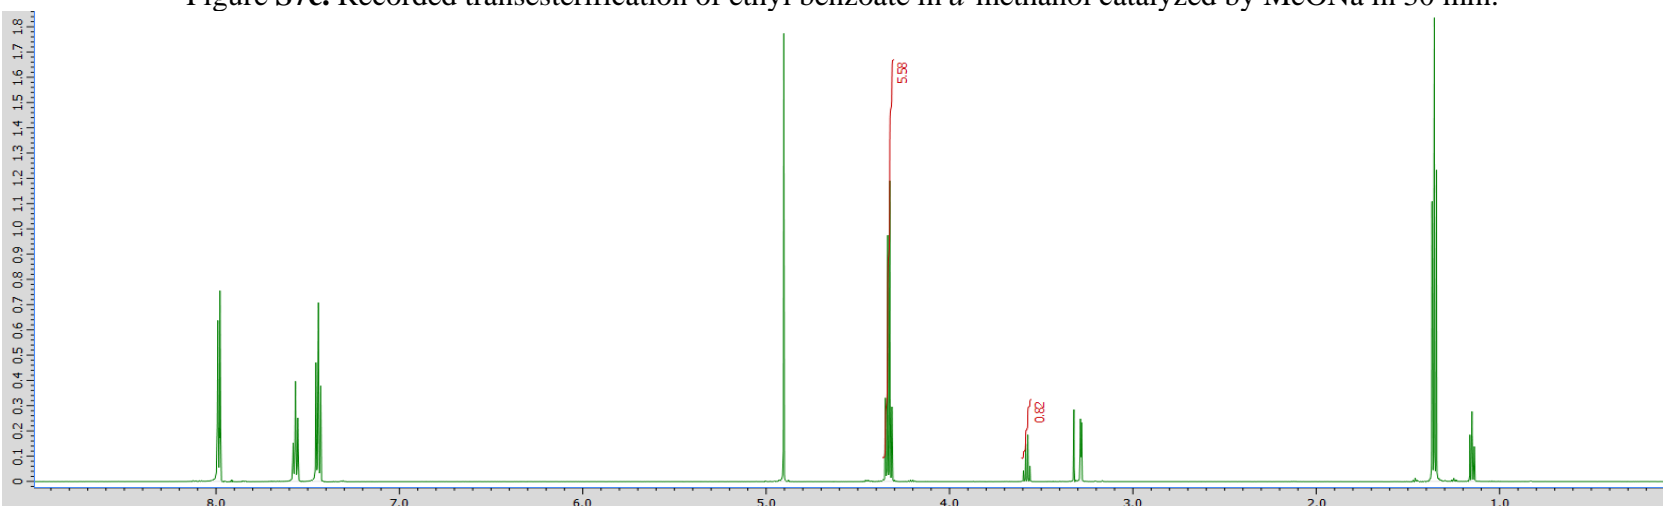

Figure S7d. Recorded transesterification of ethyl benzoate in *d*-methanol catalyzed by MeONa in 45 min.

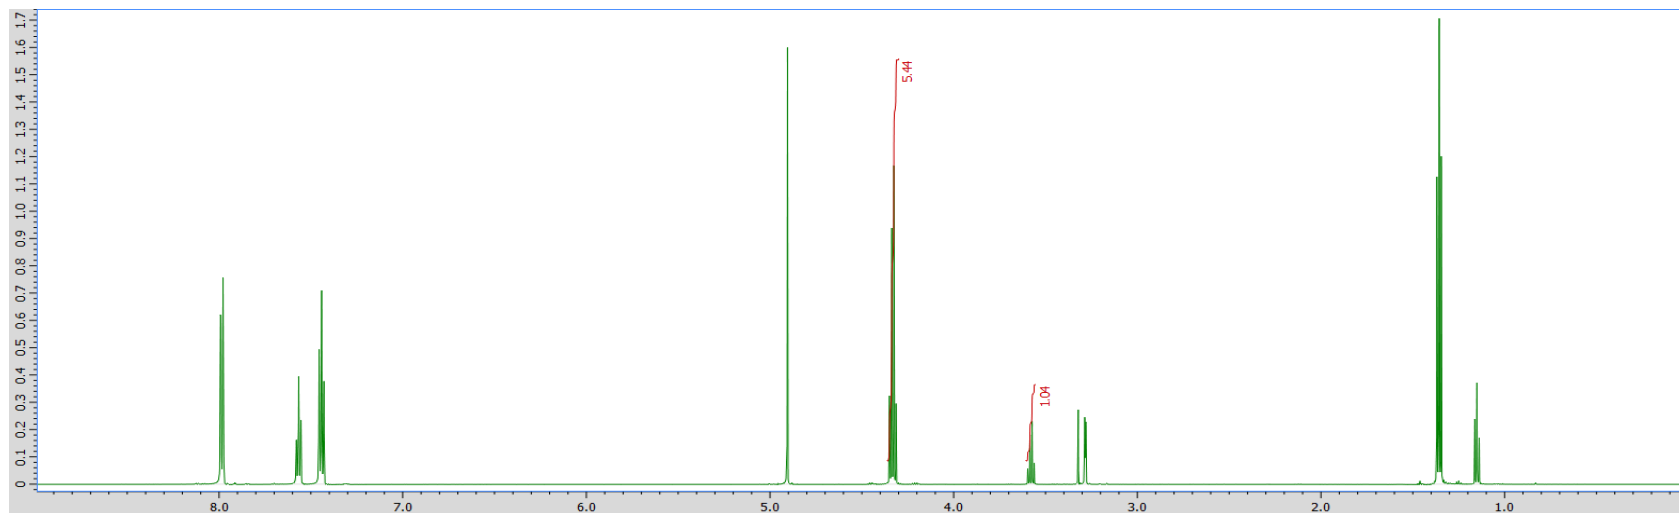

Figure S7e. Recorded transesterification of ethyl benzoate in *d*-methanol catalyzed by MeONa in 60 min.

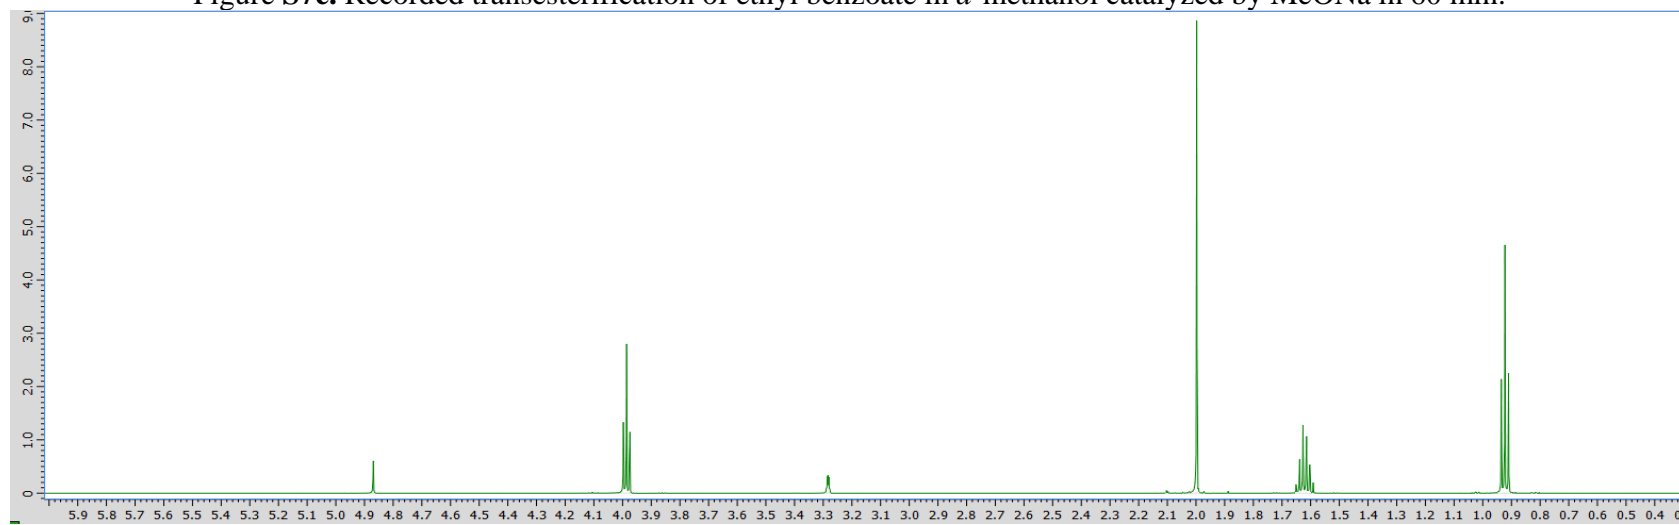

Figure S8. Recorded n-Propyl acetate in *d*-methanol

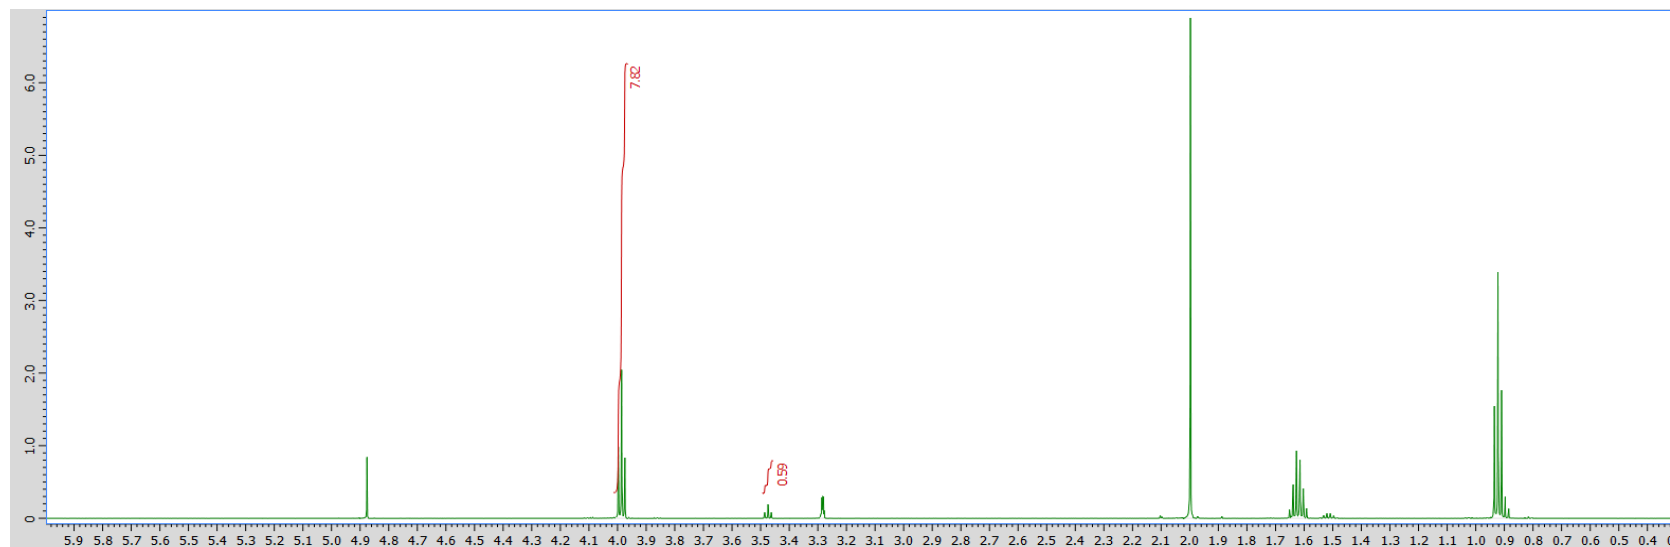

Figure S8a. Recorded transesterification of n-Propyl acetate in *d*-methanol catalyzed by NaOH in 5 min.

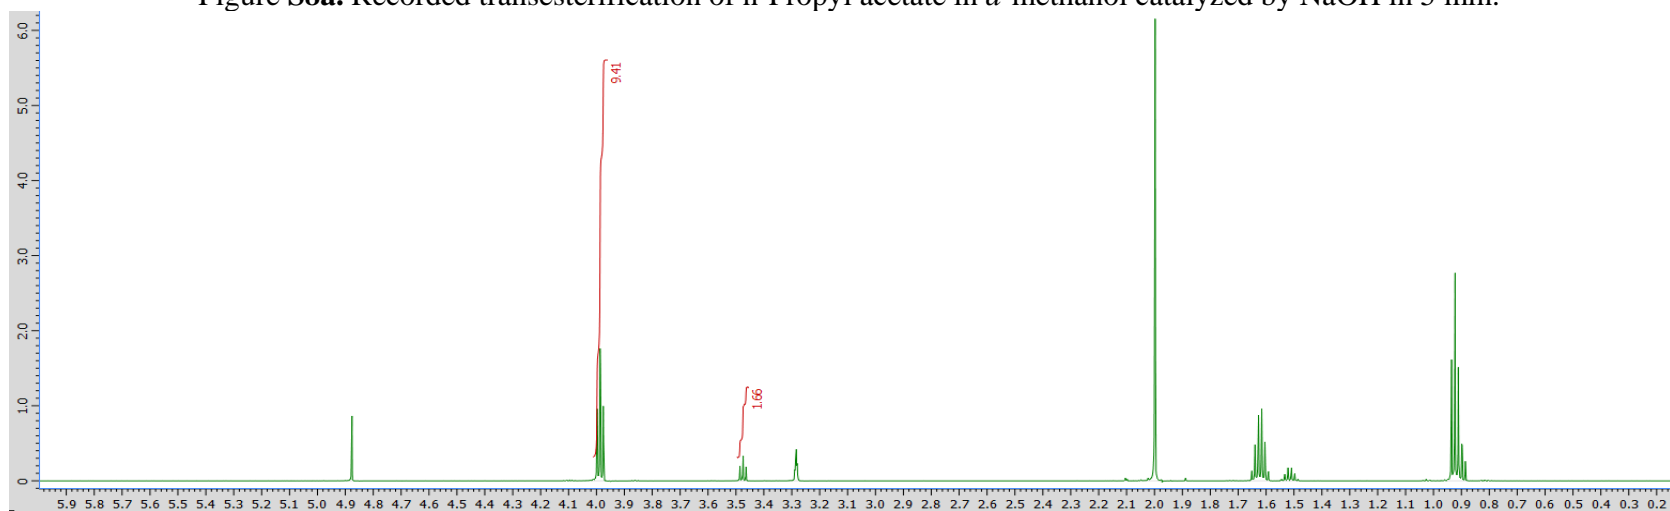

Figure S8b. Recorded transesterification of n-Propyl acetate in *d*-methanol catalyzed by NaOH in 15 min.

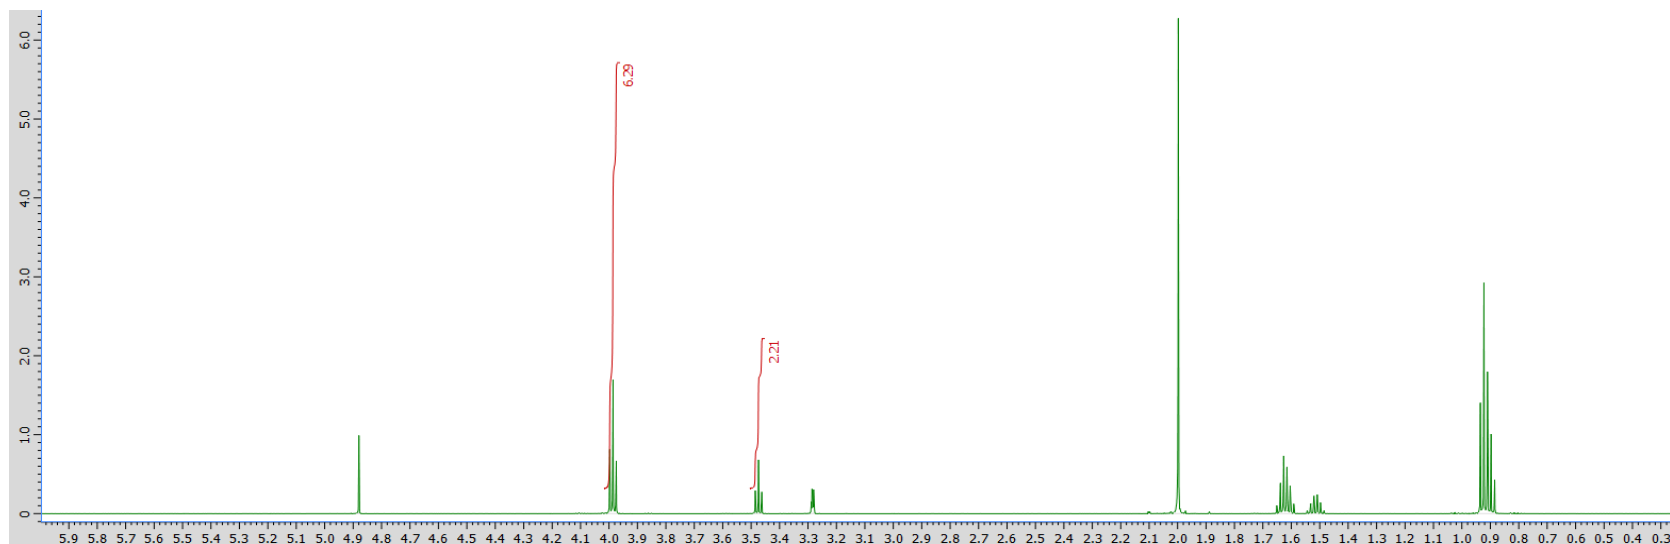

Figure S8c. Recorded transesterification of n-Propyl acetate in *d*-methanol catalyzed by NaOH in 30 min.

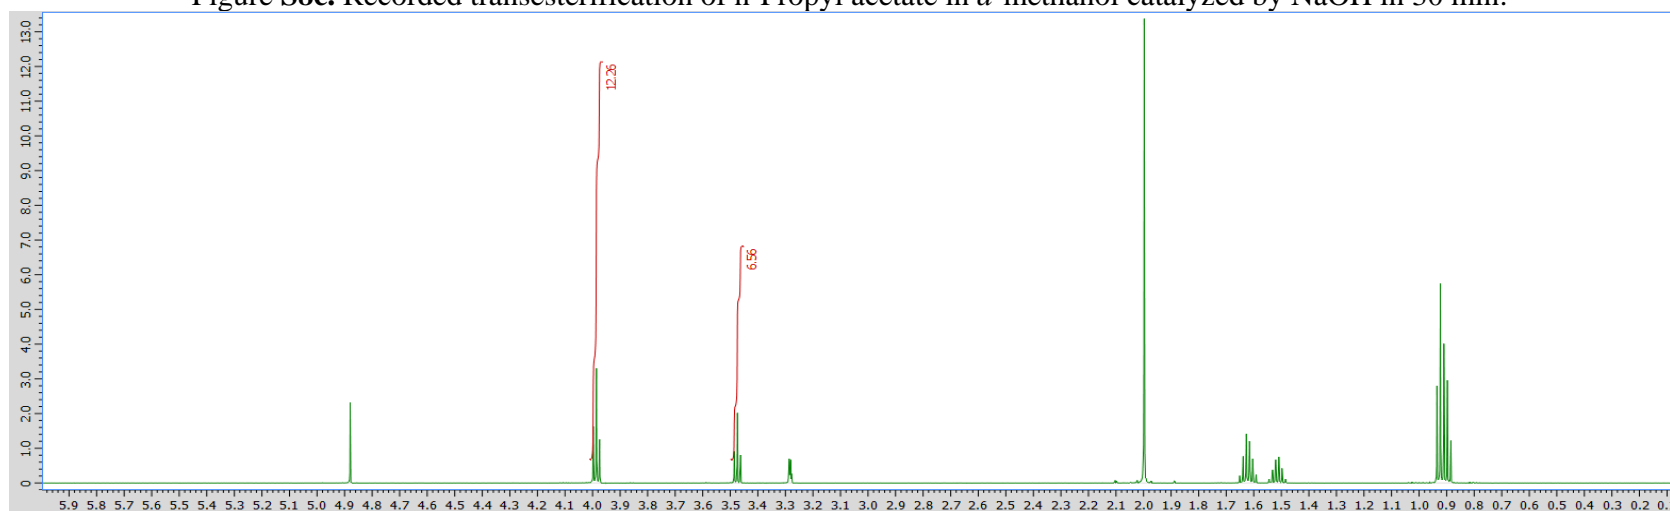

Figure S8d. Recorded transesterification of n-Propyl acetate in *d*-methanol catalyzed by NaOH in 45 min.

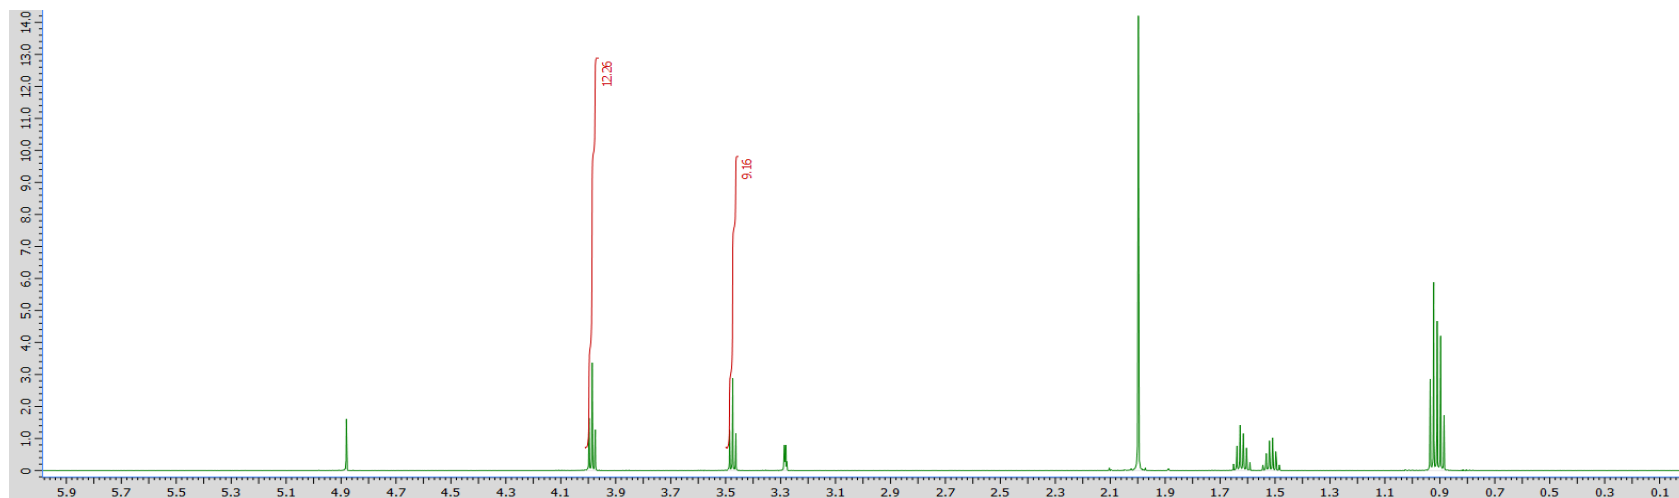

Figure S8e. Recorded transesterification of n-Propyl acetate in *d*-methanol catalyzed by NaOH in 60 min.

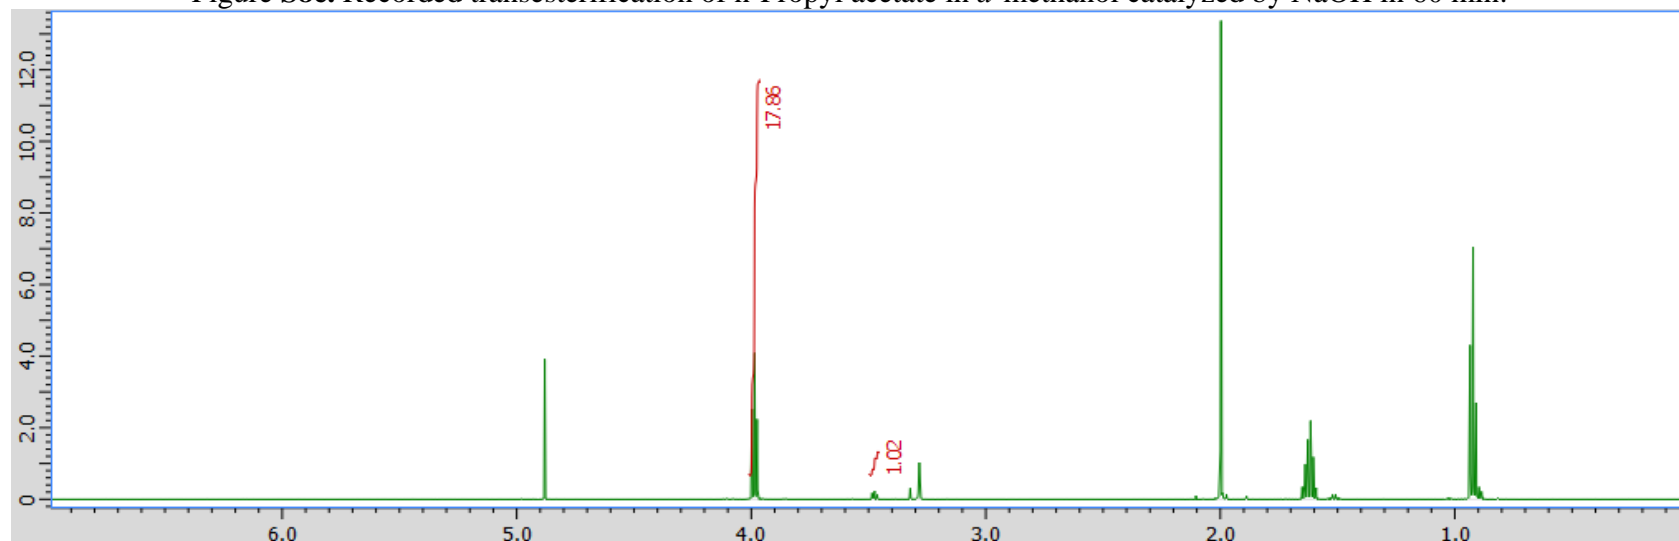

Figure S9a. Recorded transesterification of n-Propyl acetate in *d*-methanol catalyzed by MeONa in 5 min.

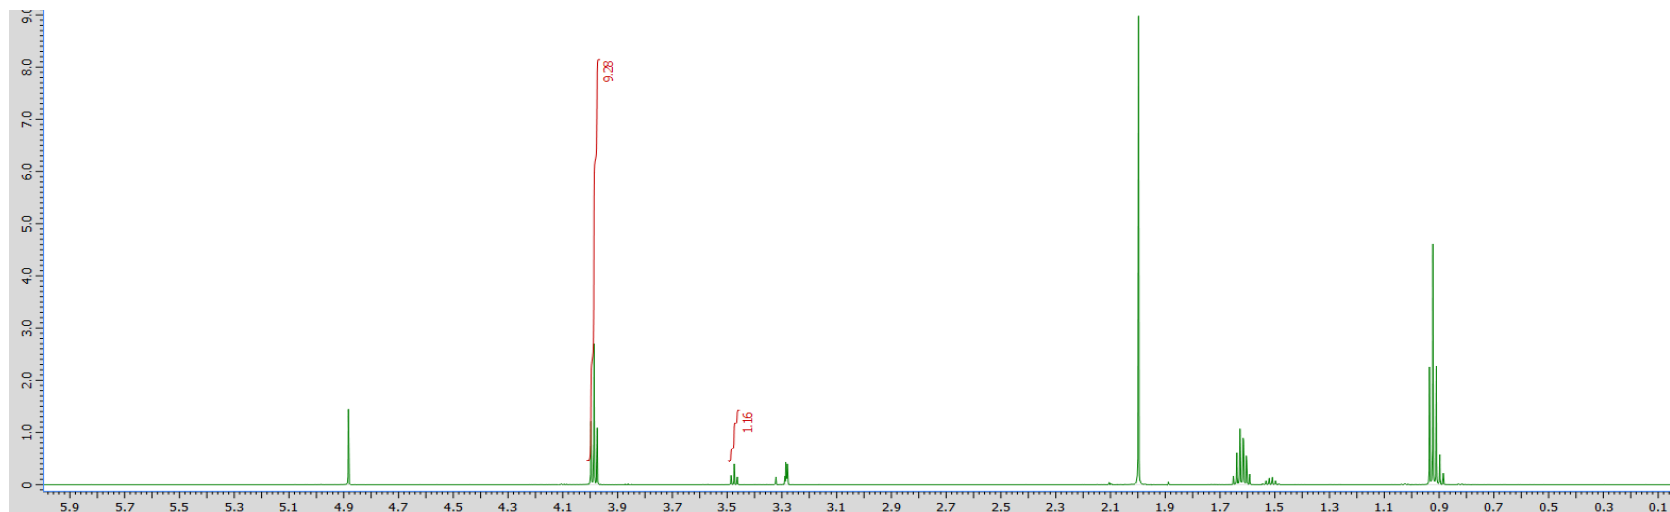

Figure S9b. Recorded transesterification of n-Propyl acetate in *d*-methanol catalyzed by MeONa in 15 min.

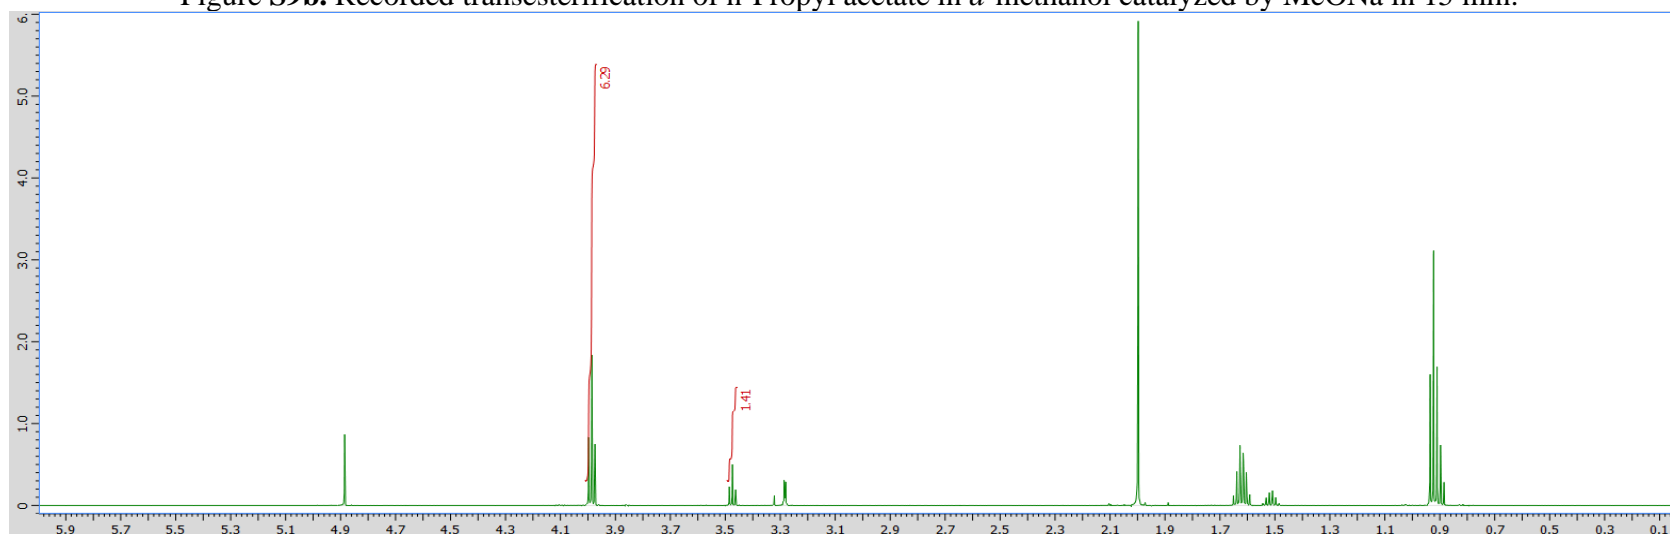

Figure S9c. Recorded transesterification of n-Propyl acetate in *d*-methanol catalyzed by MeONa in 30 min.

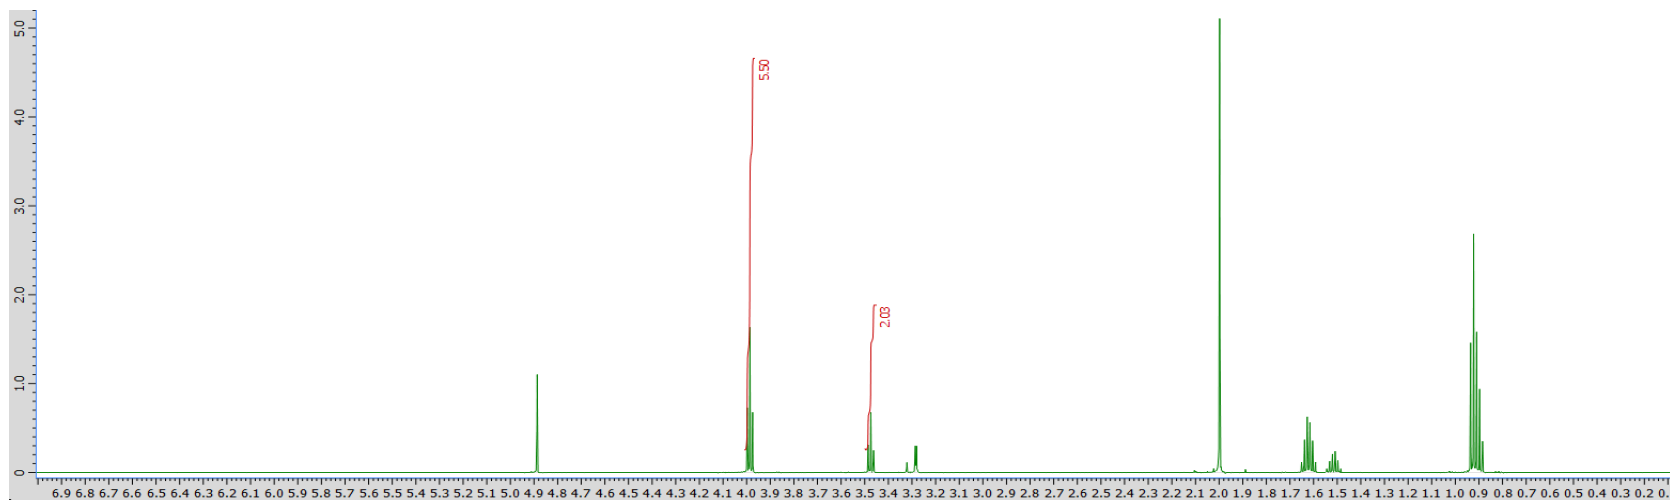

Figure S9d. Recorded transesterification of n-Propyl acetate in *d*-methanol catalyzed by MeONa in 45 min.

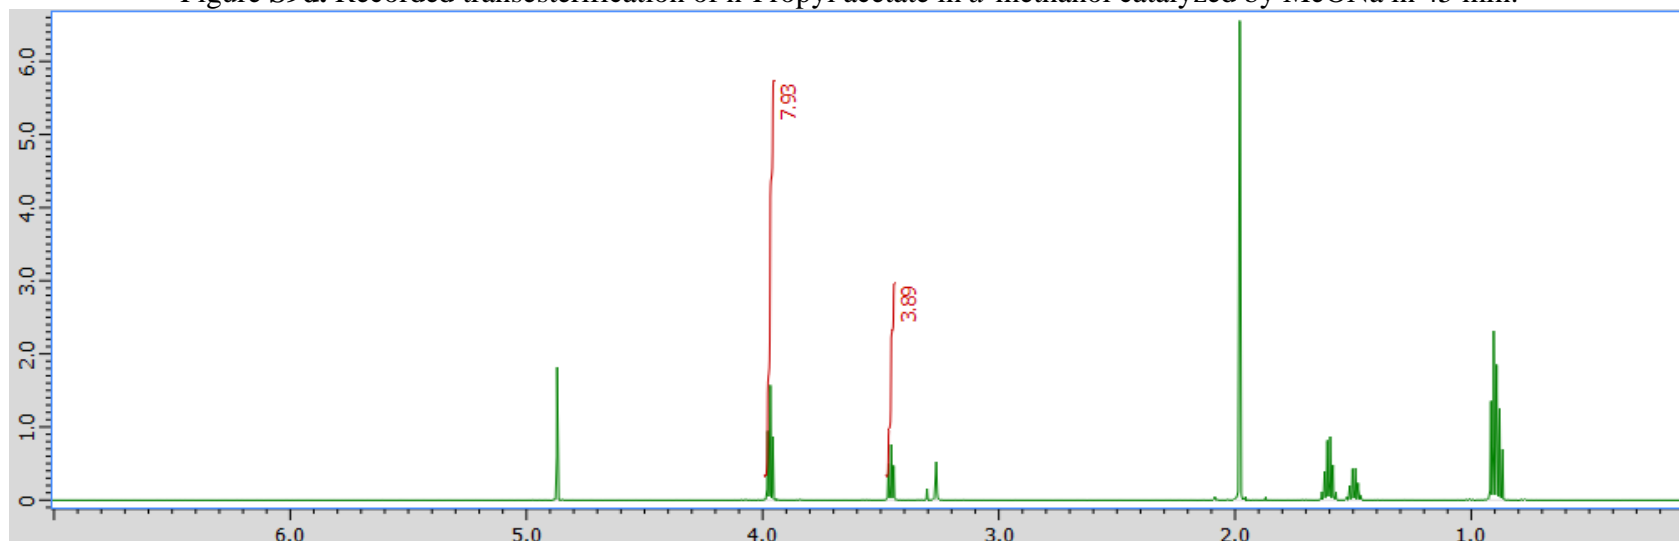

Figure S9e. Recorded transesterification of n-Propyl acetate in *d*-methanol catalyzed by MeONa in 60 min.



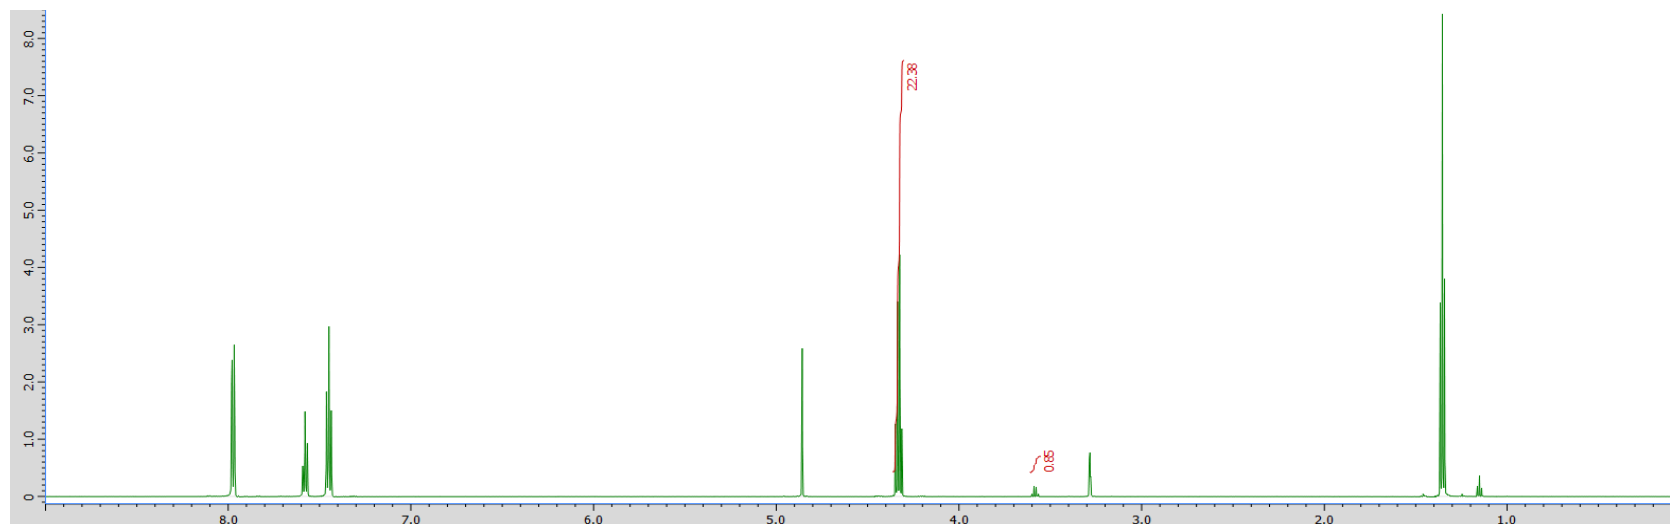

Figure S10a. Recorded transesterification of ethyl benzoate in *d*-MeOD:D<sub>2</sub>O (9:1) catalyzed by NaOH in 5 min.

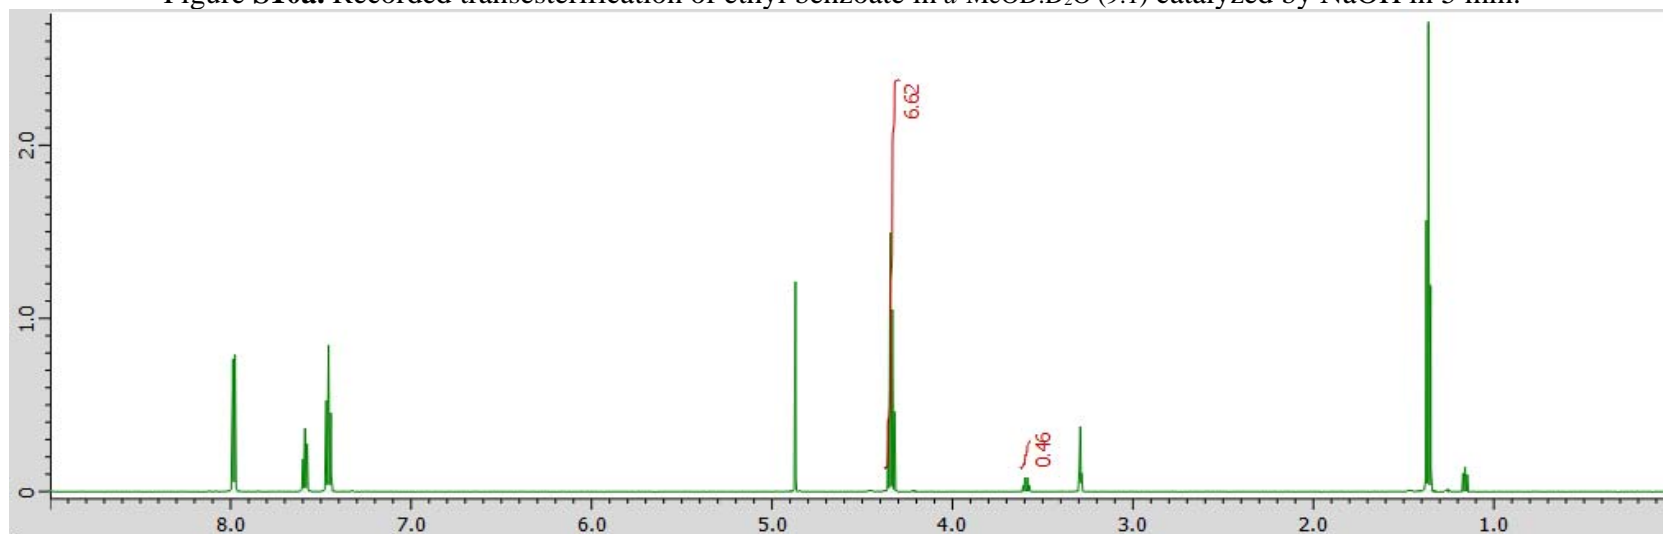

Figure S10b. Recorded transesterification of ethyl benzoate in *d*-MeOD:D<sub>2</sub>O (9:1) catalyzed by NaOH in 15 min.

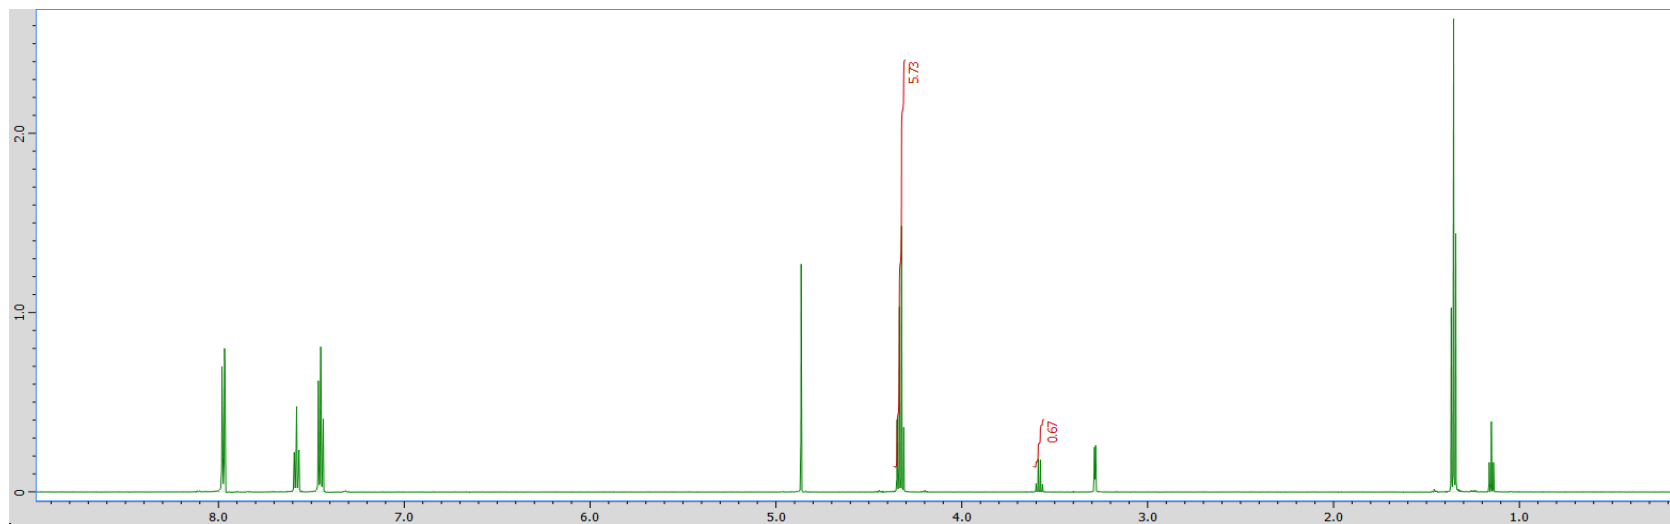

Figure S10c. Recorded transesterification of ethyl benzoate in *d*-MeOD:D<sub>2</sub>O (9:1) catalyzed by NaOH in 30 min.

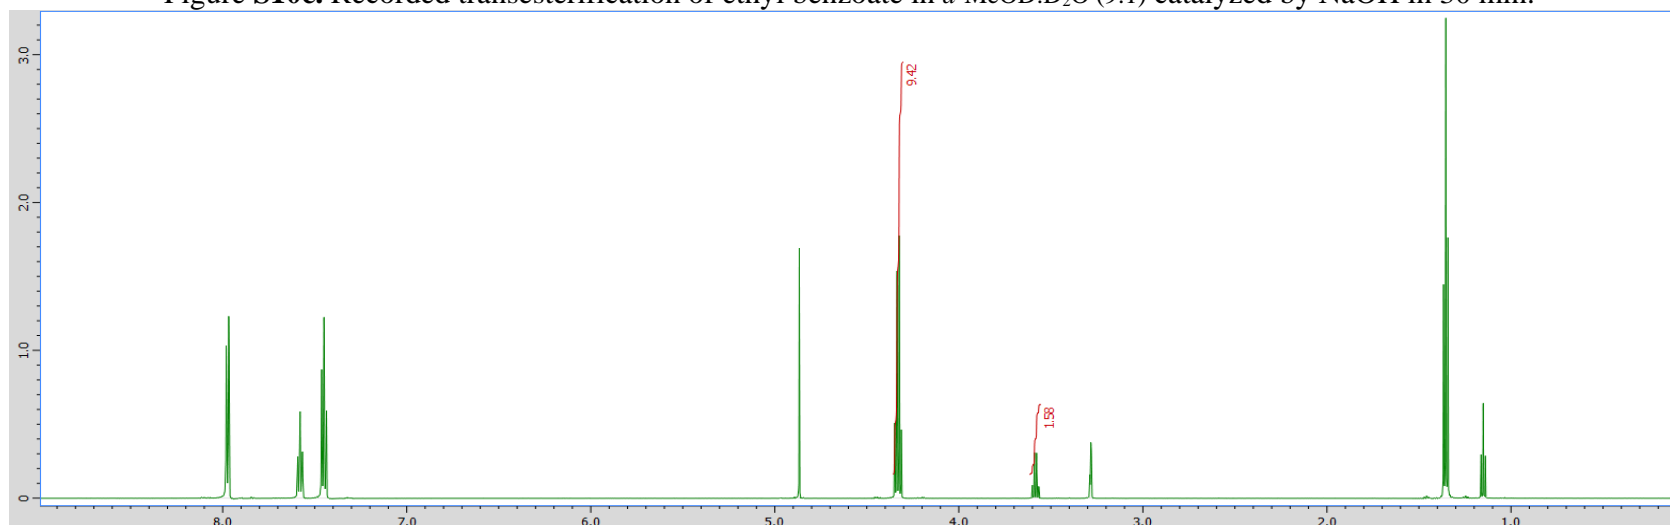

Figure S10d. Recorded transesterification of ethyl benzoate in *d*-MeOD:D<sub>2</sub>O (9:1) catalyzed by NaOH in 45 min.

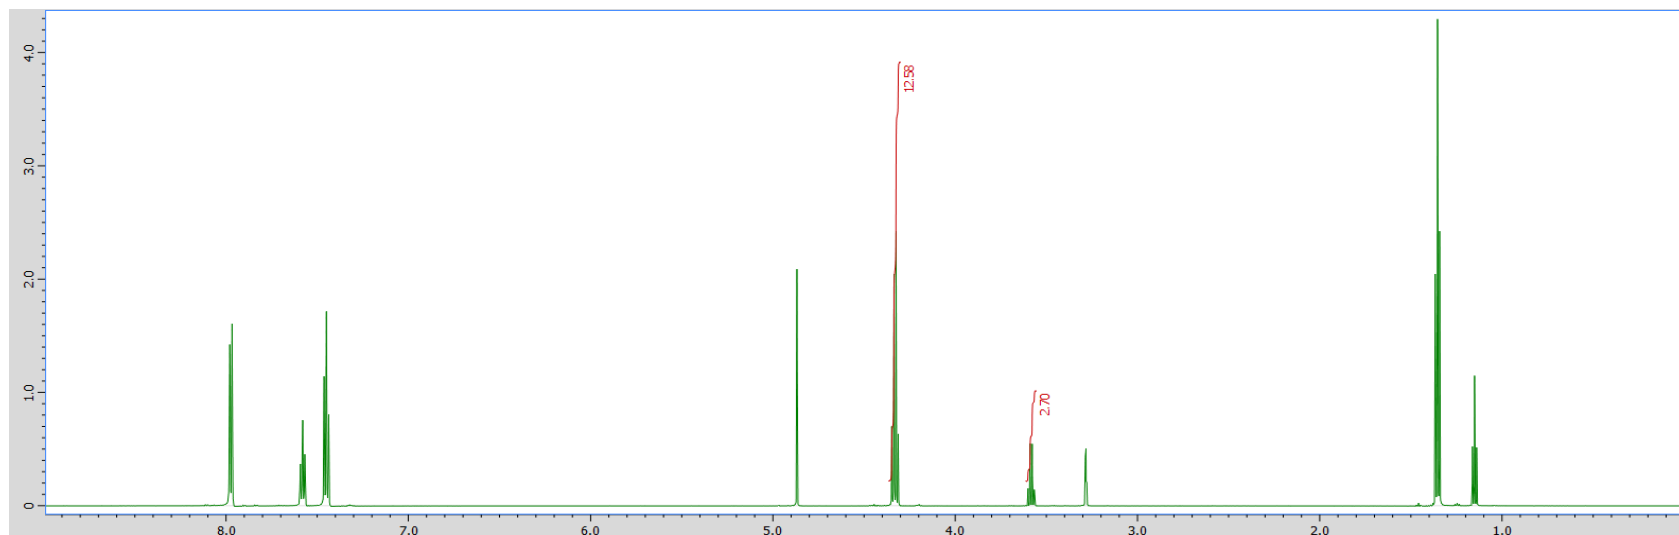

Figure S10e. Recorded transesterification of ethyl benzoate in *d*-MeOD:D<sub>2</sub>O (9:1) catalyzed by NaOH in 60 min.

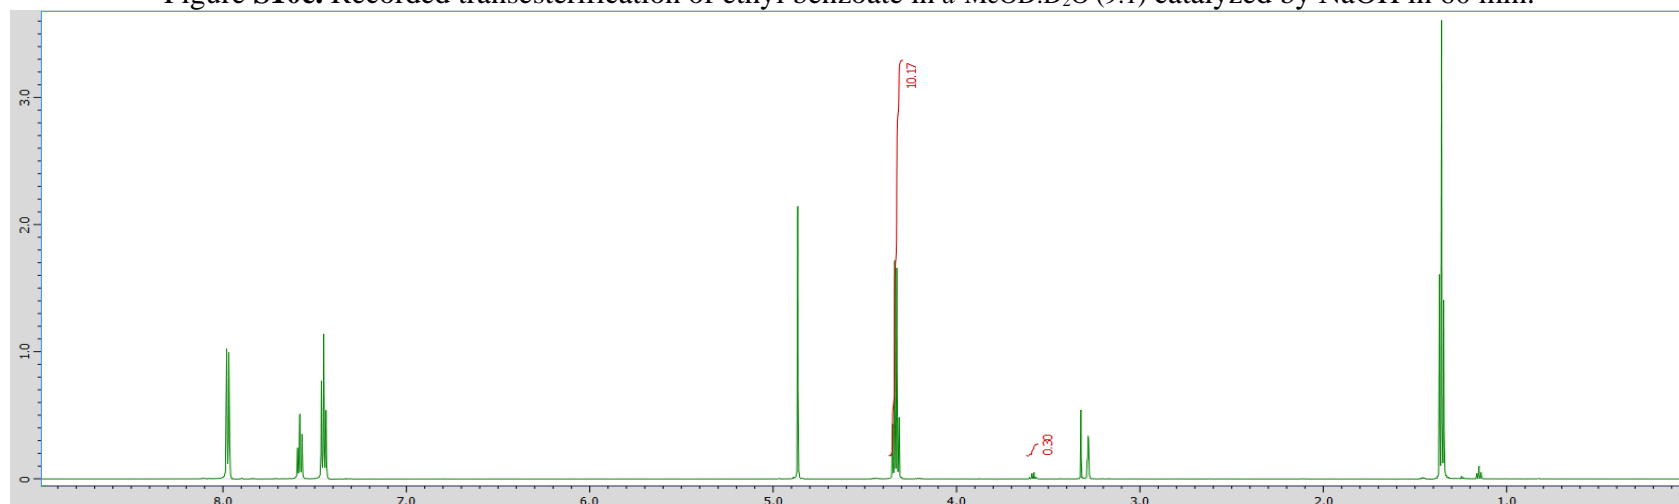

Figure S11a. Recorded transesterification of ethyl benzoate in *d*-MeOD:D<sub>2</sub>O (9:1) catalyzed by MeONa in 5 min.

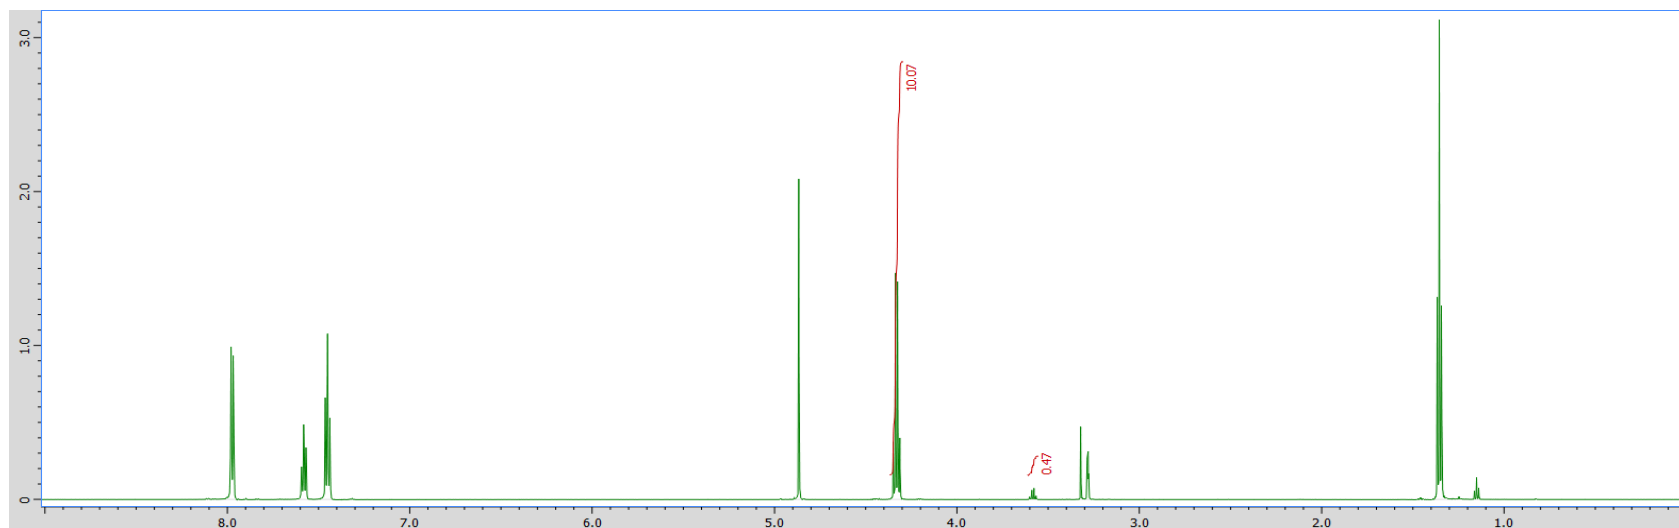

Figure S11b. Recorded transesterification of ethyl benzoate in *d*-MeOD:D<sub>2</sub>O (9:1) catalyzed by MeONa in 15 min.

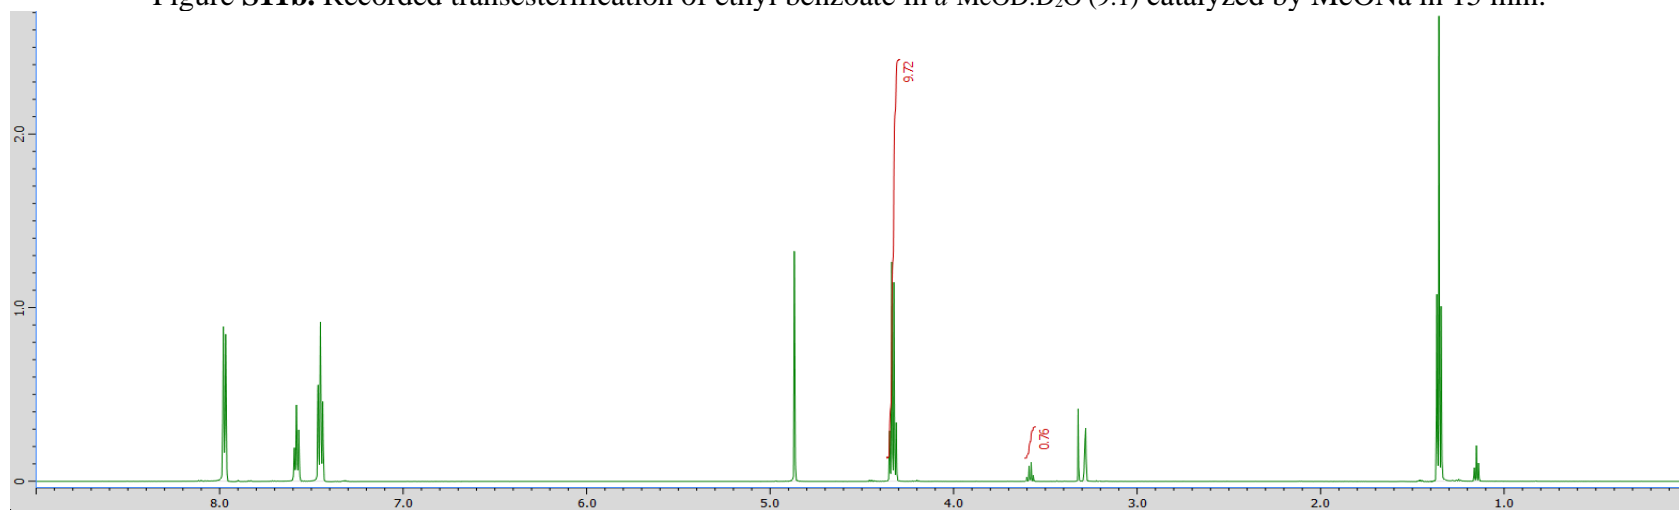

Figure S11c. Recorded transesterification of ethyl benzoate in *d*-MeOD:D<sub>2</sub>O (9:1) catalyzed by MeONa in 30 min.

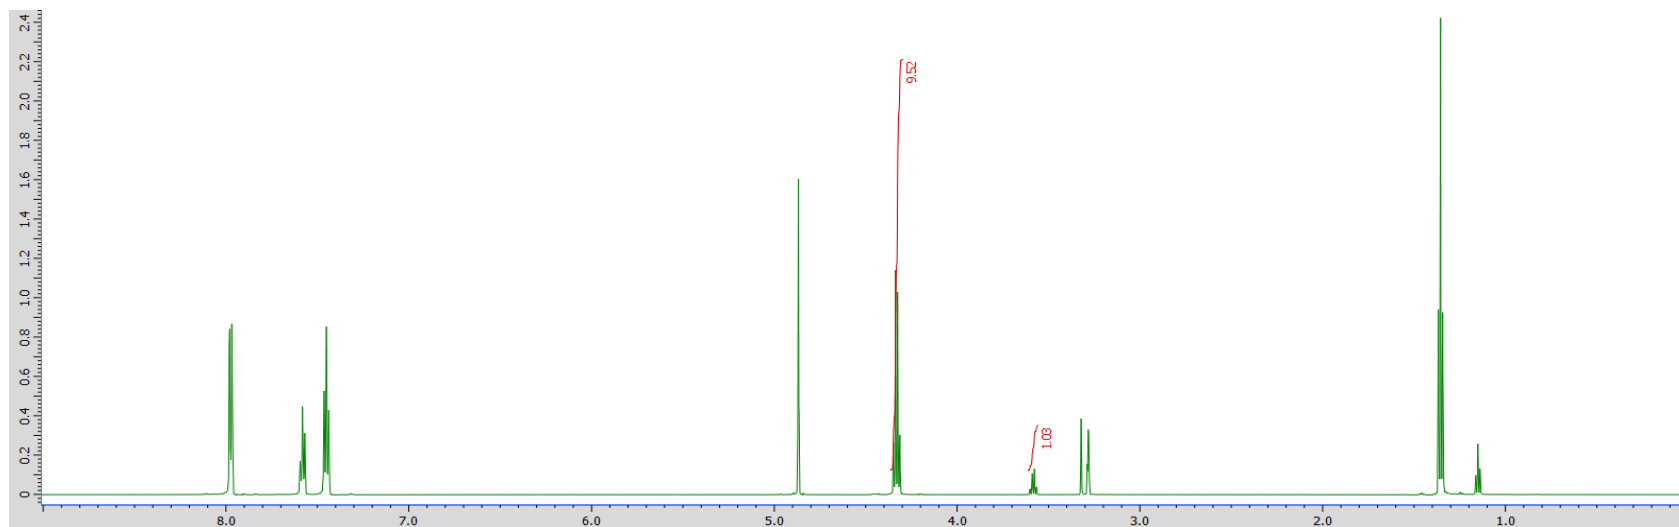

Figure S11d. Recorded transesterification of ethyl benzoate in *d*-MeOD:D<sub>2</sub>O (9:1) catalyzed by MeONa in 45 min.

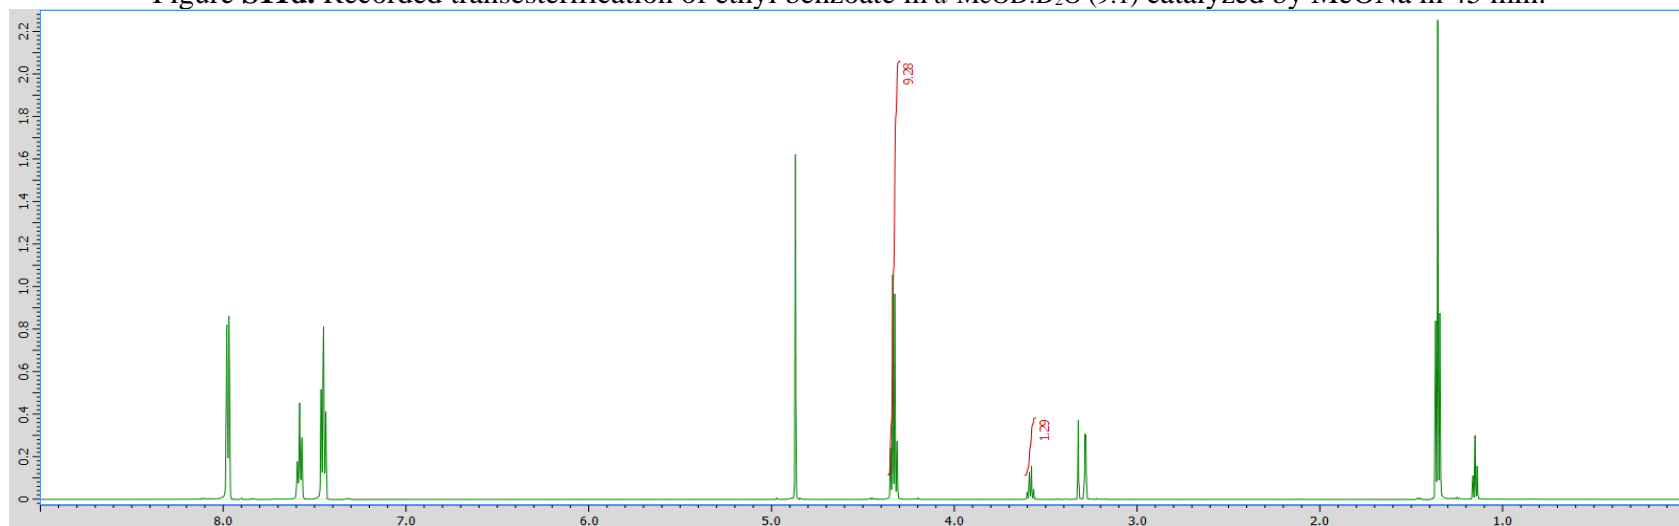

Figure S11e. Recorded transesterification of ethyl benzoate in *d*-MeOD:D<sub>2</sub>O (9:1) catalyzed by MeONa in 60 min.

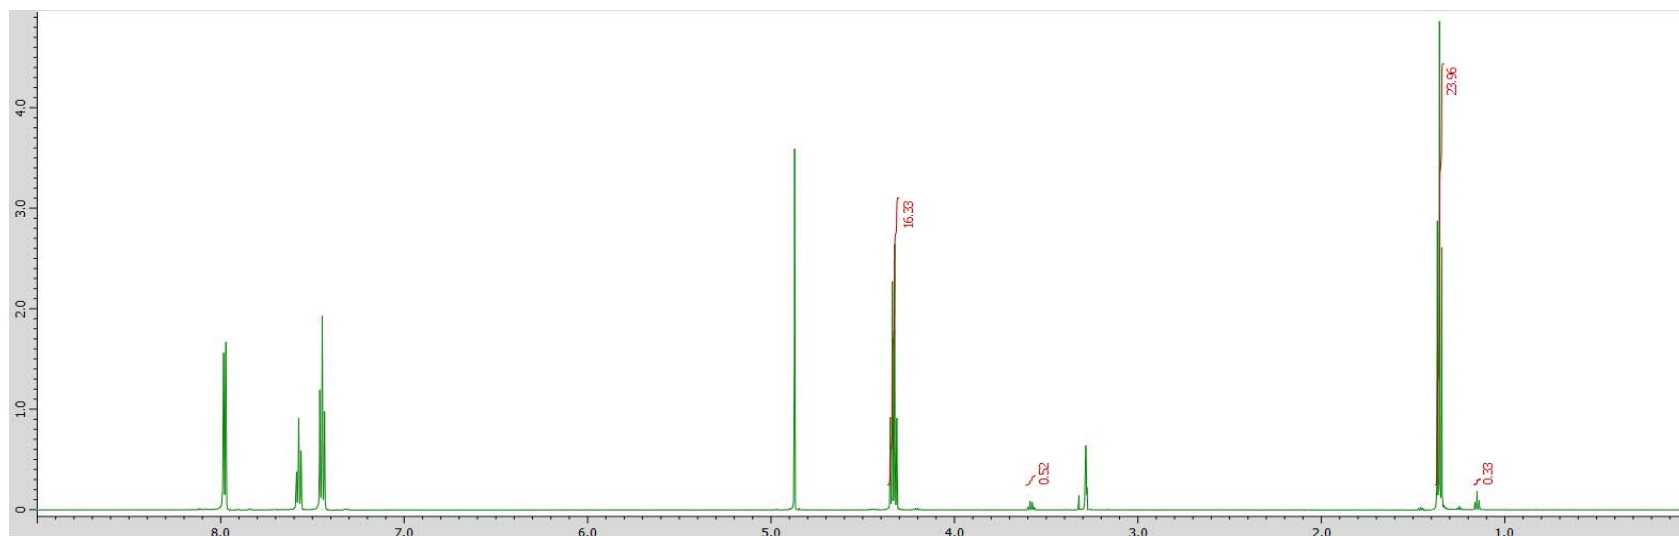

Figure S12a. Recorded transesterification of ethyl benzoate in *d*-MeOD:D<sub>2</sub>O catalyzed by NaOH in 5 min.

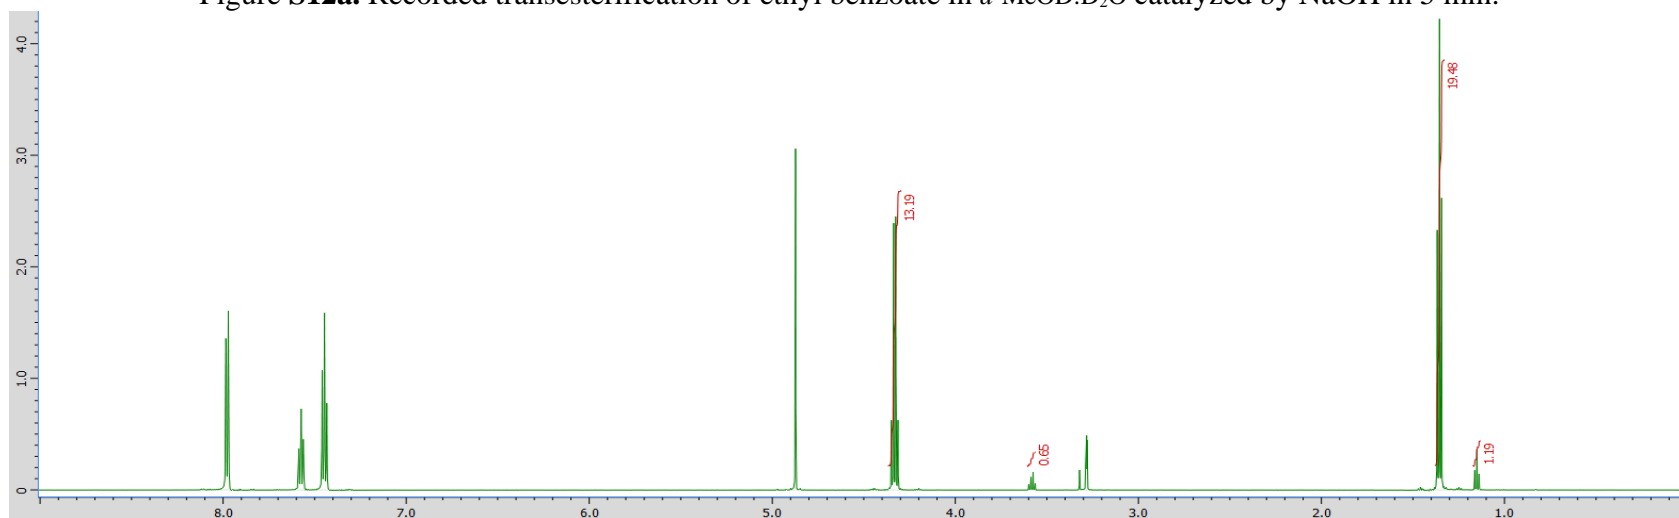

Figure S12b. Recorded transesterification of ethyl benzoate in *d*-MeOD:D<sub>2</sub>O catalyzed by NaOH in 15 min.

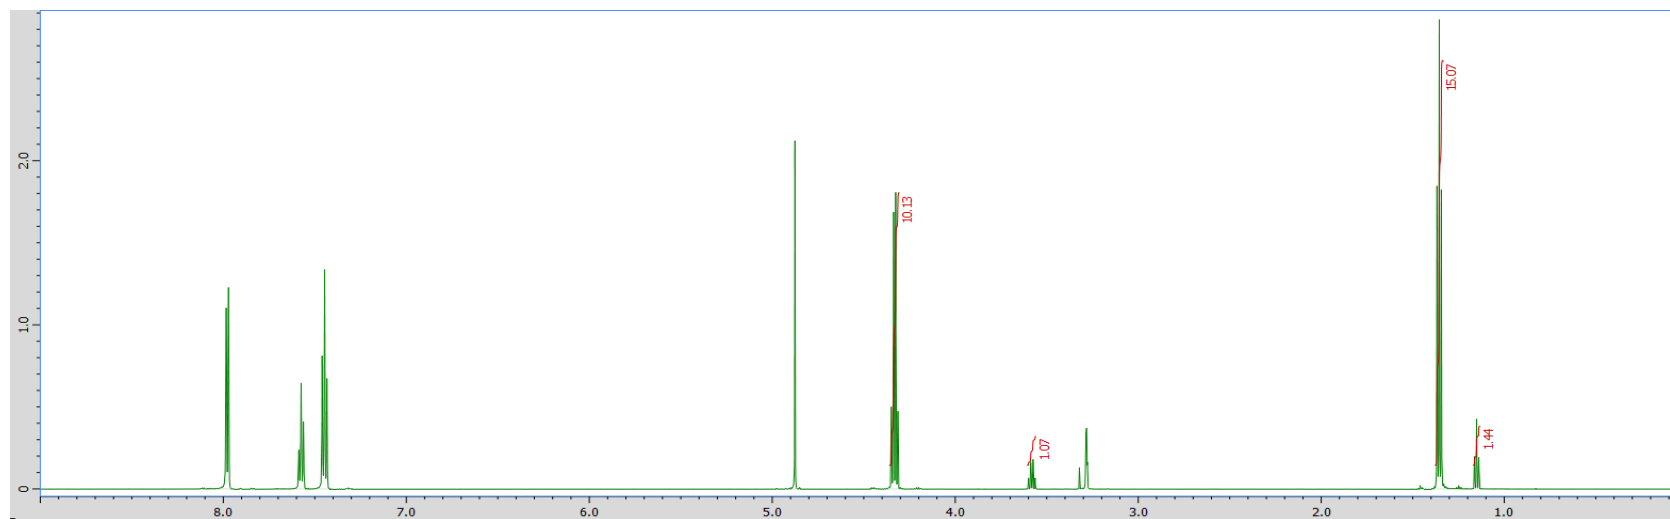

Figure S12c. Recorded transesterification of ethyl benzoate in *d*-MeOD:D<sub>2</sub>O catalyzed by NaOH in 30 min.

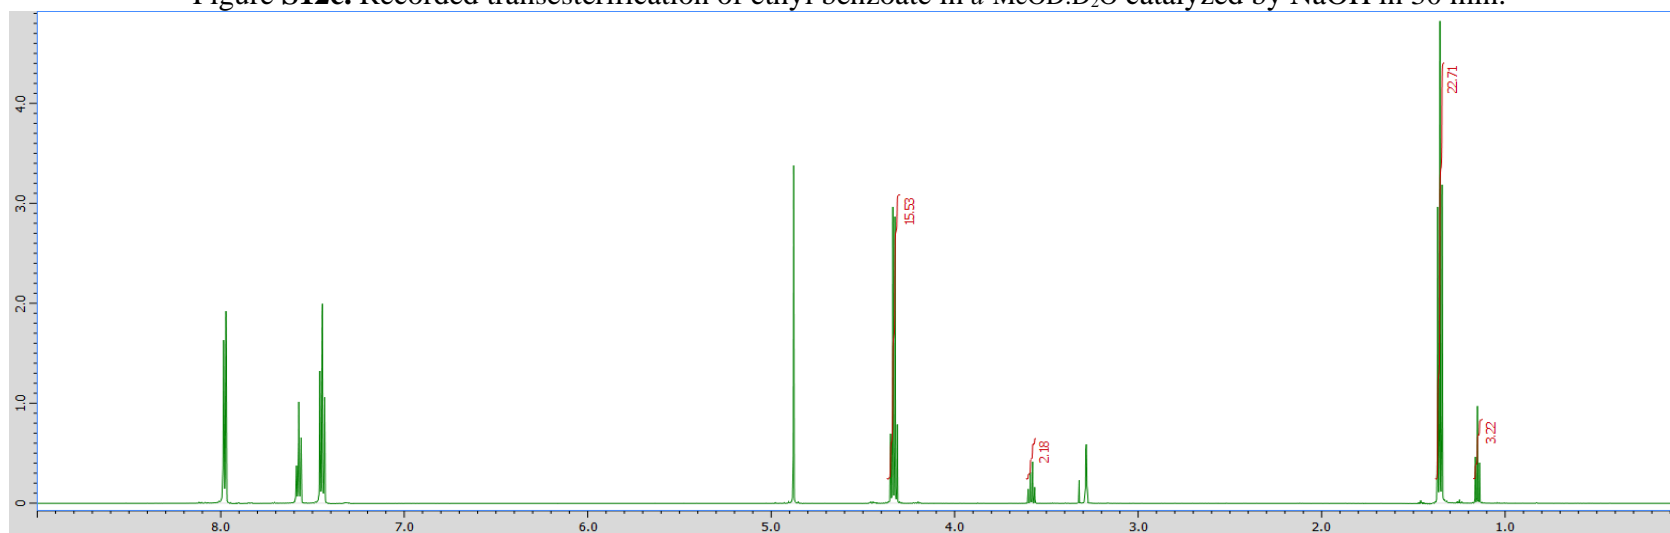

Figure S12d. Recorded transesterification of ethyl benzoate in *d*-MeOD:D<sub>2</sub>O catalyzed by NaOH in 45 min.

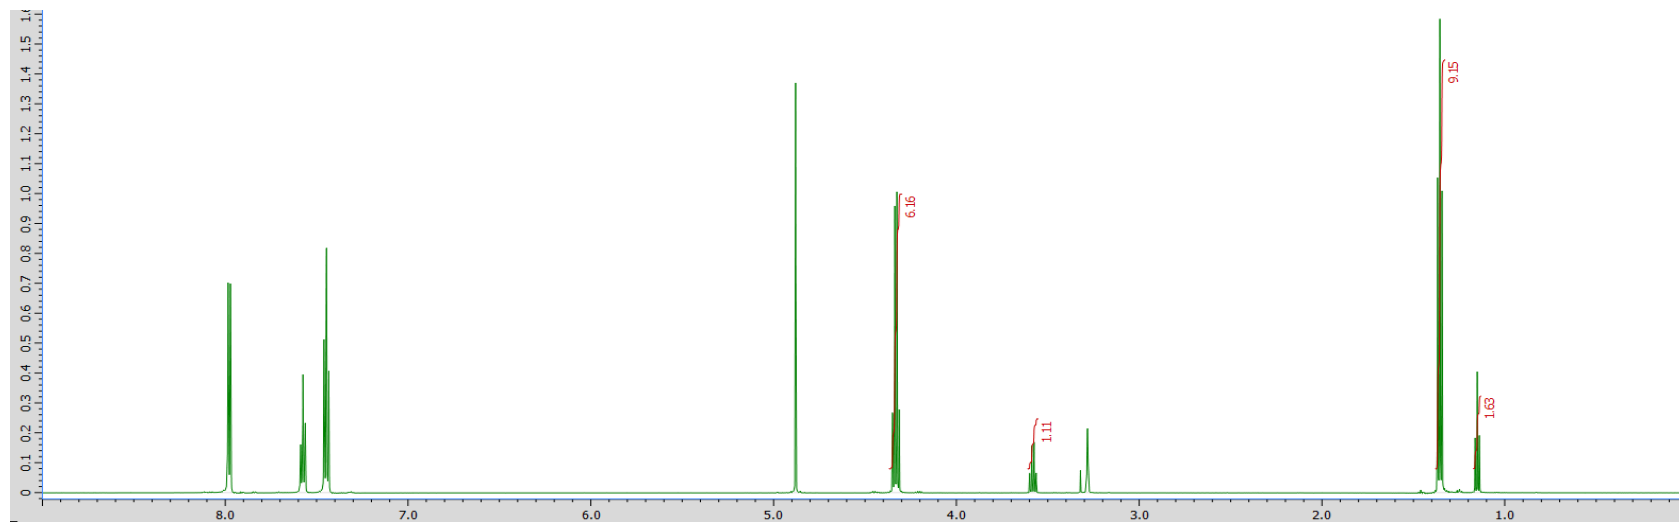

Figure S12e. Recorded transesterification of ethyl benzoate in *d*-MeOD:D<sub>2</sub>O catalyzed by NaOH in 60 min.

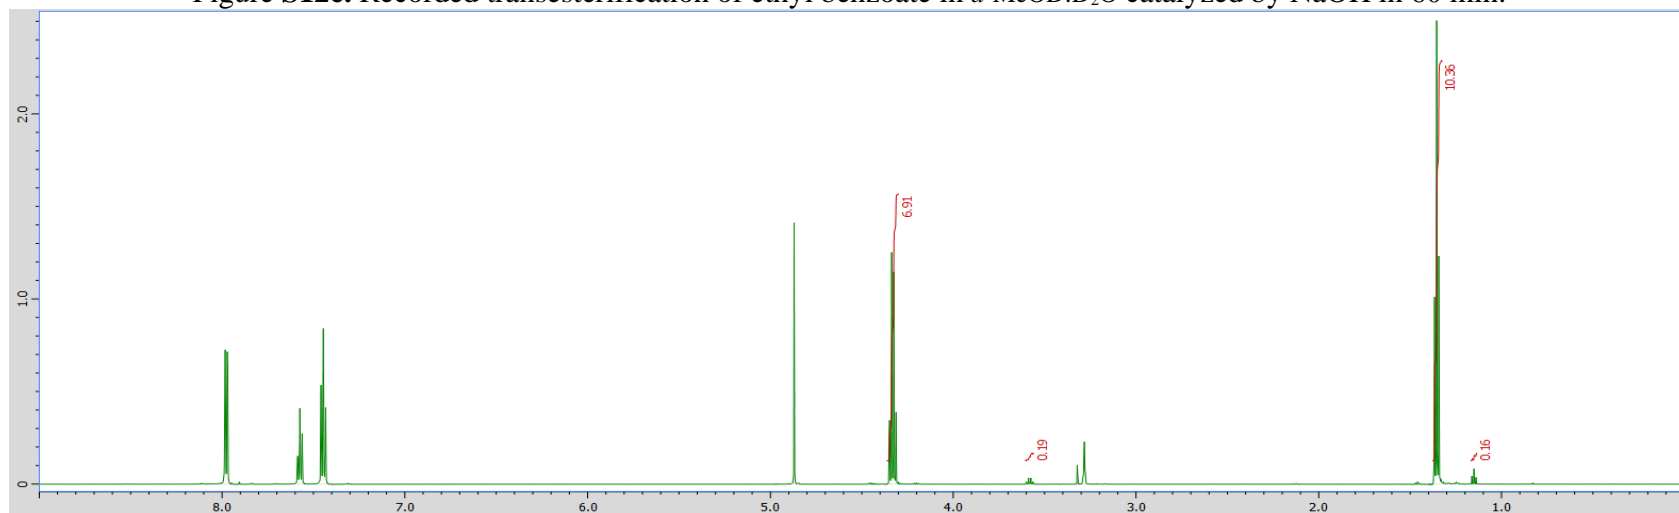

Figure S13a. Recorded transesterification of ethyl benzoate in *d*-MeOD:D<sub>2</sub>O catalyzed by MeONa in 5 min.



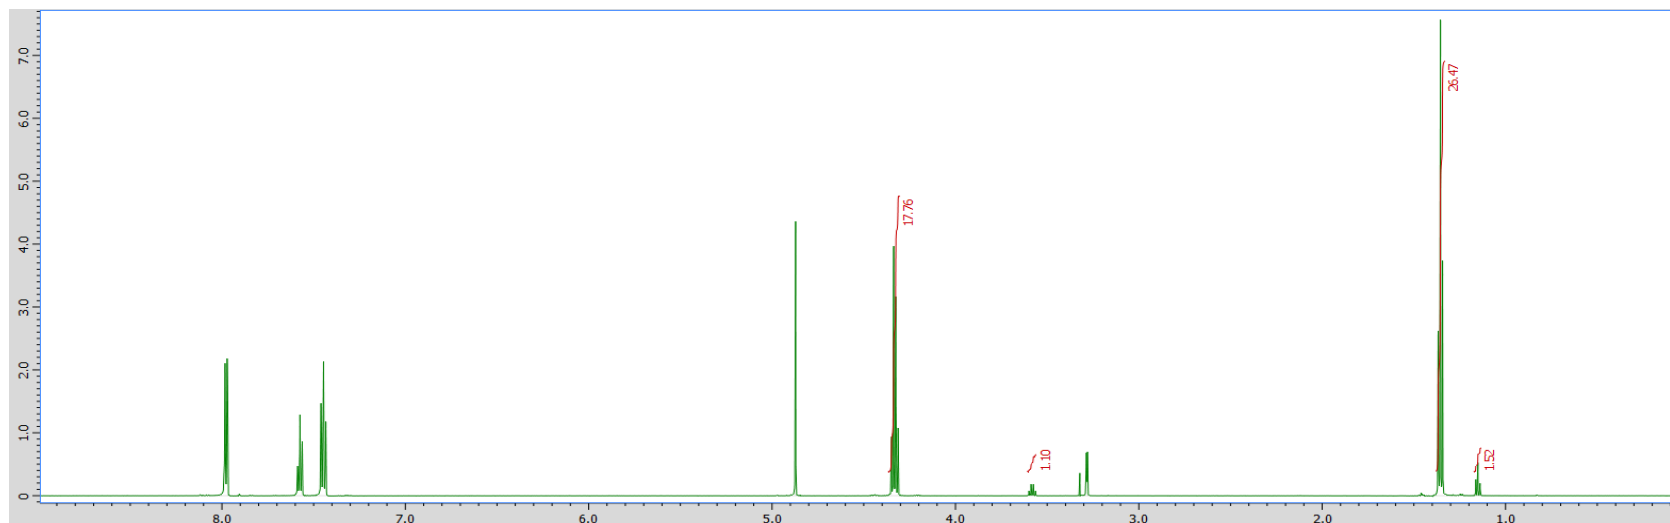

Figure S13b. Recorded transesterification of ethyl benzoate in *d*-MeOD:D<sub>2</sub>O catalyzed by MeONa in 15 min.

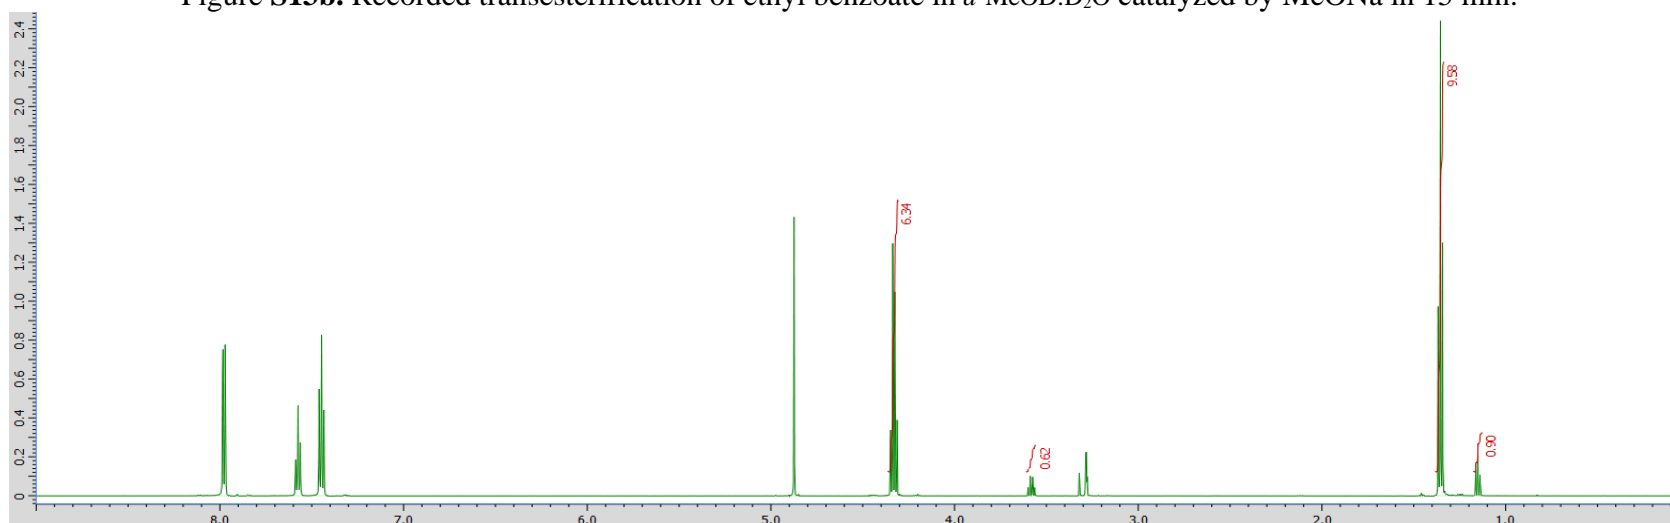

Figure S13c. Recorded transesterification of ethyl benzoate in *d*-MeOD:D<sub>2</sub>O catalyzed by MeONa in 30 min.

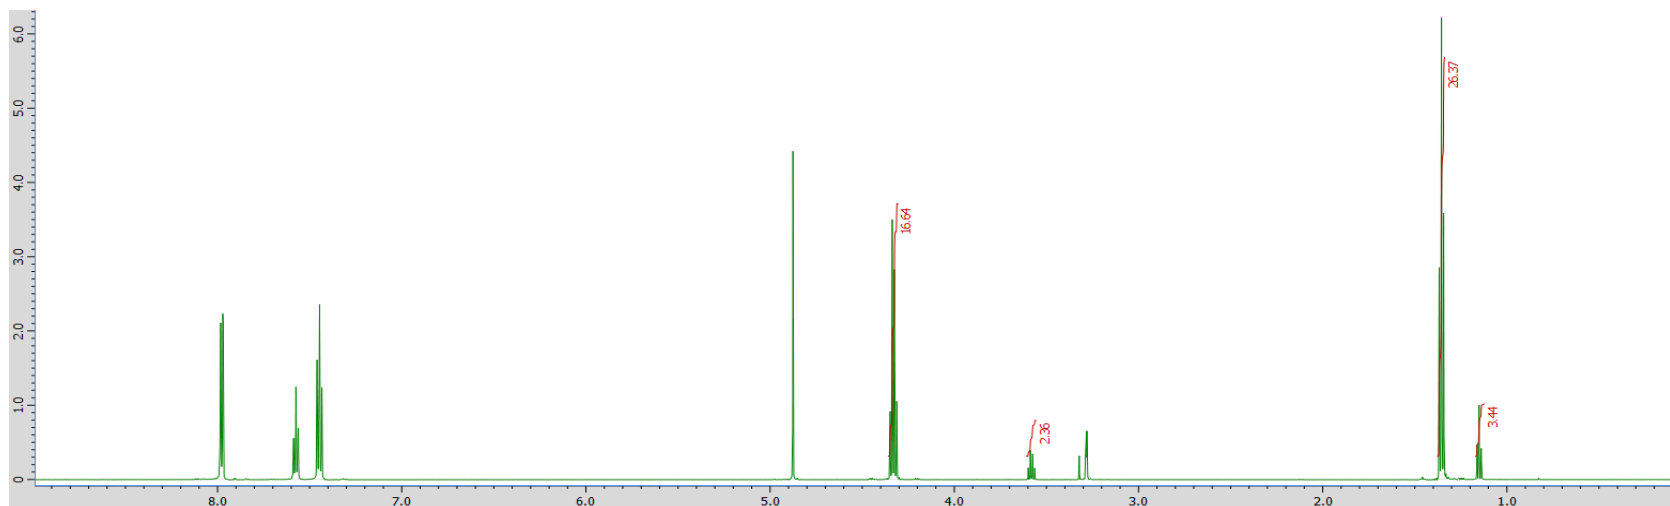

Figure S13d. Recorded transesterification of ethyl benzoate in  $d$ -MeOD: $\text{D}_2\text{O}$  catalyzed by MeONa in 45 min.

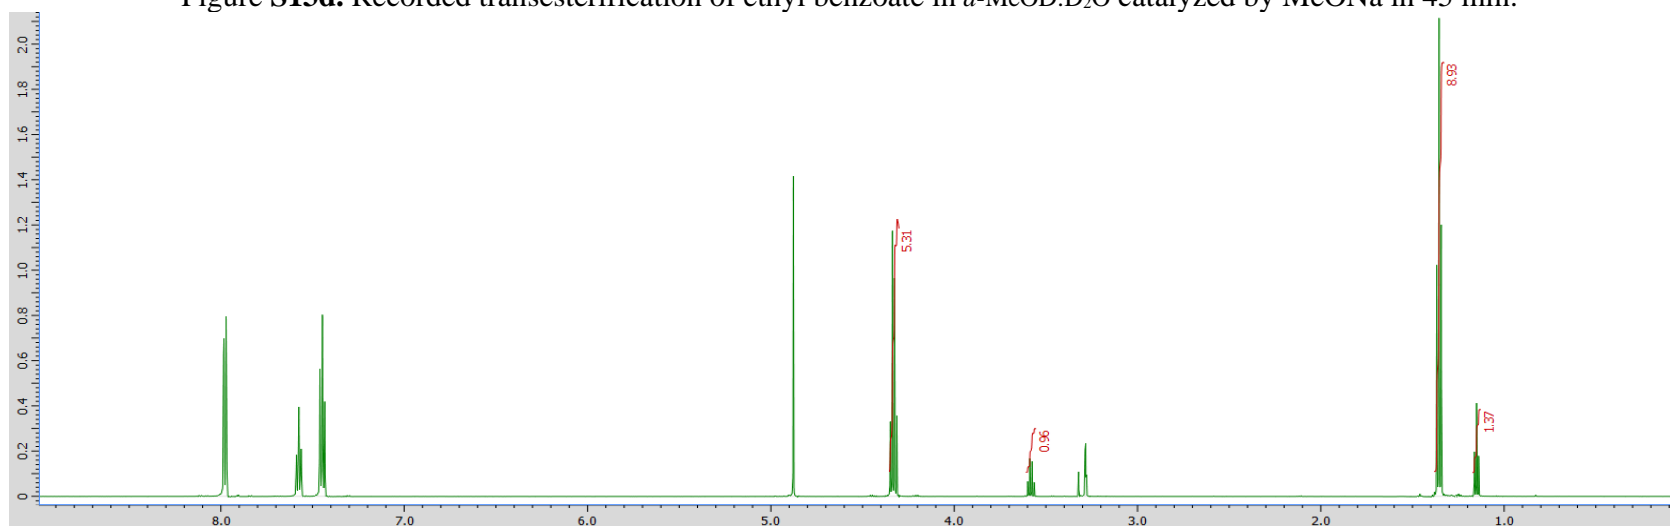

Figure S13e. Recorded transesterification of ethyl benzoate in  $d$ -MeOD: $\text{D}_2\text{O}$  catalyzed by MeONa in 60 min.
